# Supplementary material for: Distribution and cycling of carbon monoxide in surface microlayer and subsurface seawater in the eastern marginal seas of China
Source: Copernicus journal article supplement (doi:10.5194/egusphere-2025-2429), 2025-06-05
Supplement: Supplementary file [file egusphere-2025-2429-RC1-supplement.pdf]

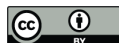

1                   **Distribution and cycling of carbon monoxide in surface microlayer and**  
2                   **subsurface seawater in the eastern marginal seas of China**

3                   Lin Yang <sup>a, b</sup>, Peiyi Bian <sup>a</sup>, Jing Zhang <sup>b, c, \*</sup>, Anja Engel <sup>e</sup>, Bin Yang <sup>a</sup>, Gui-Peng Yang <sup>b, c, d, \*</sup>

4                   <sup>a</sup> *Jiangsu Key Laboratory of Marine Bioresources and Environment, Jiangsu Ocean University, Lianyungang,*

5                   *222005, China*

6                   <sup>b</sup> *Frontiers Science Center for Deep Ocean Multispheres and Earth System, and Key Laboratory of Marine*

7                   *Chemistry Theory and Technology, Ministry of Education, Ocean University of China, Qingdao 266100, China*

8                   <sup>c</sup> *Laboratory for Marine Ecology and Environmental Science, Qingdao National Laboratory for Marine Science and*

9                   *Technology, Qingdao 266237, China*

10                  <sup>d</sup> *Institute of Marine Chemistry, Ocean University of China, Qingdao 266100, China*

11                  <sup>e</sup> *GEOMAR Helmholtz Centre for Ocean Research, 24105 Kiel, Germany*

12                  \*Corresponding author:

13                  *E-mail address: [zhangjouc@ouc.edu.cn](mailto:zhangjouc@ouc.edu.cn) (J. Zhang); [gpyang@mail.ouc.edu.cn](mailto:gpyang@mail.ouc.edu.cn) (G.P.*

14                  *Yang)*

15

16

17                  **Keywords:** Carbon monoxide; Enrichment Factors; Surface microlayer; Sea-to-air flux;

18                  Photoproduction; Bacterial consumption; Eastern marginal seas of China

19

---

\* Corresponding authors. Key Laboratory of Marine Chemistry Theory and Technology, Ministry of Education, Ocean University of China, Qingdao 266100, China  
*E-mail addresses:* [zhangjouc@ouc.edu.cn](mailto:zhangjouc@ouc.edu.cn) (J. Zhang); [gpyang@mail.ouc.edu.cn](mailto:gpyang@mail.ouc.edu.cn) (G.P. Yang)

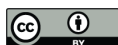

## 20 Abstract

21 Sea-surface microlayer (SML) is the boundary interface between the atmosphere  
22 and ocean, exhibiting an enrichment of dissolved organic matter (DOM) and  
23 participating in air-sea gas exchange. However, how do DOM enrichment in the SML  
24 control the flux of several gases remains poorly understood. In our study, laboratory  
25 experiments and in situ investigation in the eastern marginal seas of China were  
26 conducted to determine the enrichment factors (EFs) of carbon monoxide (CO) and  
27 DOM and their production and consumption rates in the SML during winter. CO,  
28 chromophoric DOM (CDOM), and fluorescent DOM (FDOM) were frequently  
29 enriched in the SML during winter. Although CO, CDOM and FDOM concentrations  
30 decreased from in-shore regions to open ocean, higher EFs of CO and DOM in the SML  
31 were generally observed in off-shore regions. Moreover, the EF of CO was lower than  
32 EFs of CDOM and FDOM, which appeared to be related to the faster consumption rates  
33 of CO in the SML. Considering the photoproduction rate (mean value:  $12.4 \text{ nmol L}^{-1} \text{ d}^{-1}$ )  
34 was significantly higher than the bacteria consumption rate (mean value:  $3.8 \text{ nmol L}^{-1} \text{ d}^{-1}$ )  
35 of CO in the SML, the EF and the concentration of CO in SML showed a large  
36 diurnal variation, with the higher values observed in the early afternoon. The Flux of  
37 CO exhibited a significantly negative correlation with CDOM absorption ( $a_{\text{CDOM}(254)}$ )  
38 and fluorescence marine humic-like Component 3 in the SML, suggesting that elevated  
39 DOM could stimulate the photoproduction of CO, but may also decrease air-sea CO  
40 exchange in the SML.

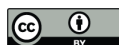

## 41    **1. Introduction**

42        Carbon monoxide (CO) plays an important role in atmospheric chemistry (Nguyen  
43    et al., 2020). It is the predominant sink of hydroxyl radical (OH•, Conte et al., 2019;  
44    Nguyen et al., 2020), which oxidize pollutants and greenhouse gases (such as CH<sub>4</sub>)  
45    emitted to the atmosphere by human activities (Nguyen., 2020). The photodegradation  
46    of dissolved organic matter (DOM) is thought to be the main source of CO in the ocean  
47    (Stubbins et al., 2006), and ocean acts as a source of atmospheric CO (Mopper and  
48    Kieber, 2002). In addition, direct production of CO by phytoplankton has been observed  
49    in laboratory experiments (Gros et al., 2009) and dark/thermal production was also  
50    inferred from modeling at Bermuda Atlantic Time Series (BATS, Kettle, 2005), and  
51    from incubations of water samples from the Delaware Bay (Xie et al., 2005) and St  
52    Lawrence estuary (Zhang et al., 2008). The first time marine production of CO by  
53    macroalgae was found by Troxler et al. (1972), which was related to the occurrence of  
54    bile pigments. However, direct biological production is still considered to be a minor  
55    contributor to the global ocean CO budget (Fichot and Miller, 2010) and dark  
56    production has been estimated to account for only 10%–32% of global ocean CO  
57    production (Zhang et al., 2006). Microbial consumption and the sea-to-air fluxes  
58    (Doney et al., 1995, Song et al., 2015) of CO are considered to be the main sinks of  
59    oceanic CO (Zafiriou et al., 2003). CO is rapidly removed from the atmosphere  
60    (lifetime of 2 months) by two major processes: geochemical oxidation by atmospheric  
61    hydroxyl radicals (85%) and biological oxidation by soil microorganisms (10%)  
62    (Cordero et al., 2019). With increasing concern about atmospheric pollution and the

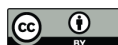

63 potential role of CO, a primary goal of studying oceanic CO concentrations is to  
64 evaluate its long-term stability and distribution trends in the **marine boundary layer**  
65 (Conte et al., 2019; Xu et al., 2023). However, CO has not been widely studied in most  
66 coastal regions over the last decade.

67 The **sea surface microlayer** (SML) is located at the air-sea interface and is  
68 considered to play a critical role in global biogeochemical cycles and climate change  
69 by regulating the air-sea exchange of relatively insoluble gases and aerosol particles  
70 (Liss and Duce, 1997; Cunliffe et al., 2013). The SML has long been known as a source  
71 of gels and airborne particles. For decades, articles have emphasized the presence and  
72 enrichment of organic matter in the SML (Liss and Duce, 1997; Orellana et al., 2011).  
73 Enrichment Factor (EF) is used to compare the properties of the SML and subsurface  
74 water (SSW), and EF of a compound is defined as the ratio of the concentration in the  
75 SML to that in the corresponding SSW. **Higher EF values of CO and DOM in the SML**  
76 **indicated the significant enrichment properties with respect to SSW waters.** In addition,  
77 SML is exposed to the most intense solar radiation of any seawater layer, especially  
78 ultraviolet (UV) light, and shows significant higher colored dissolved organic matter  
79 (CDOM) concentration and microbial abundances compared to the SSW (Obernosterer  
80 et al., 2006; Obernosterer et al., 2008; Wurl et al., 2009; Yang et al., 2022), suggesting  
81 there are more active photochemical and biochemical processes in the SML. Therefore,  
82 SML contains physically, chemically, and biologically distinct environments compared  
83 to the SSW (Cunliffe et al., 2011). Surfactants, are amphipathic organic substances that  
84 adsorb on aquatic phase boundaries, including the air-sea interface that covers ocean's



85 surface, and mediate all mass transfer across the SML (Rickard et al., 2019 and 2022).  
86 Furthermore, strong spatiotemporal gradients in gas transfer velocity ( $k_w$ ) were  
87 inversely correlated with natural surfactants, especially in the SML and in the  
88 underlying near-surface seawater (Pereira et al., 2018). Thus, the present study aimed  
89 to clarify the influence of the enrichment of DOM in the SML on sea-air CO exchange  
90 by relating seawater DOM concentrations to CO emissions to the atmosphere. CDOM  
91 absorption  $a_{CDOM}(254)$  is an effective proxy for dissolved organic carbon (DOC) and  
92 chlorophyll-*a* (Chl-*a*) concentrations in the eastern marginal seas of China (Yang et al.,  
93 2021). It is purported to correspond to absorbance by relatively small, simple  
94 compounds (conjugated carbon double bonds) (Lønborg et al., 2018), and it can be used  
95 as an indicator for the relatively bio-labile pool of DOM (Guallar and Flos, 2019).

96 An estimated 10% of surface CO is released into the atmosphere via the sea-to-  
97 air interface (Yang et al. 2024). Although intense solar radiation and enrichment of  
98 DOM may promote CO photoproduction involving SML (Cunliffe et al., 2013; Pereira  
99 et al., 2018; Sugai et al., 2021), and likely modifies sea-to-air gas transfer velocity ( $k_w$ )  
100 of CO and other gases (Pereira et al., 2018). The role and response of the SML, along  
101 with the complex interplay of biological, geochemical, and physical processes, which  
102 govern the transfer of CO from the SSW, where it can either be consumed by bacteria  
103 or released into the atmosphere, are much less well understood. Our study hypothesized  
104 that SML specific environmental changes (i.e., enrichment processes and biochemical  
105 processes) and the abundance and composition of DOM in the eastern marginal seas of  
106 China influence the rate of sea-to-air CO exchange; they contribute to the formation of



107 the marine boundary layer involved in atmospheric chemistry and climate regulation.  
108 Our study aimed to clarify the roles of the sea-to-air CO exchange, photochemical  
109 production, and biological consumption of CO in SML ( $[\text{CO}]_{\text{sml}}$ ) and SSW ( $[\text{CO}]_{\text{sur}}$ ) and  
110 establish a CO budget model for the marine boundary layer chemistry.

## 111 2. Materials and Methods

### 112 2.1 Study Area

113 The Yellow Sea (YS) and the East China Sea (ECS) are marginal seas of the  
114 western Pacific Ocean with complicated hydrological characteristics and are  
115 substantially affected by the Yellow Sea Cold Water Mass (YSCWM), the Kuroshio  
116 Current, and the coastal currents (Fig. 1). The YSCWM is a low-temperature ( $< 10^{\circ}\text{C}$ )  
117 and high-salinity (32.0–33.0) water mass. Seawater in the Kuroshio presents high  
118 temperatures ( $20\text{--}29^{\circ}\text{C}$ ), high salinities (34.2–34.8), and very low suspended  
119 particulate concentrations (SPC) ( $< 2 \text{ mg L}^{-1}$ ) (Yang et al., 2022). Changjiang  
120 River contributed more than 80% of the total freshwater inflow to the YS and the ECS  
121 (Wang et al., 2020). The coastal currents are characterized by low temperatures ( $9\text{--}$   
122  $24^{\circ}\text{C}$ ), low salinities (15.0–31.5), and high SPC ( $> 20 \text{ mg L}^{-1}$ ). There are also  
123 considerable freshwater sources draining into the coastal current areas, including the  
124 Yalu River, the Changjiang River, and the Min River. Furthermore, the Changjiang  
125 River Estuary (CRE) and the adjacent area are greatly affected by diluted water and  
126 monsoon, with high nutrients and variable salinity distributions. In addition, the  
127 atmospheric circulation in the study area was generally governed by the East Asian



monsoon, with strong northerly winds prevailing from September to April, and low pressure over the northwestern Pacific Ocean producing offshore winds that transported continental air masses into the study area (Li et al., 2019).

## 2.2 Sampling

We collected 52 paired SML and SSW water samples in the YS and ECS aboard the R/V “*Dong Fang Hong 3*” from 28 December 2019 to 16 January 2020. There were 38 sampling stations during the daytime (7:00–19:00) and 32 sampling stations during the nighttime (19:00–7:00). SSW samples were collected at 2–5 m depth using 24 × 10 L Niskin bottles mounted on a rosette equipped with a conductivity–temperature–depth (CTD) profiler. SML sampling used a Garrett Screen (Garrett, 1965) (mesh: 16, wire diameter: 0.36 μm; effective surface area: 2.025 cm<sup>2</sup>) according to standard procedures routine in our work (Pereira et al., 2016; Sabbaghzadeh et al., 2017). While SML integrity is disrupted by a moving vessel, or when sampling from its stern (Cunliffe and Wurl, 2014; Wurl et al., 2016), the SML can be successfully sampled from a vessel's bow while on-station (Sabbaghzadeh et al., 2017) with the ambient waterflow toward the RV (Cunliffe and Wurl, 2014). The sampling distance is at a certain distance (5 ~ 8 m) which the CTD sampler was deployed, and CO did not change during the sampling. We therefore adopted this procedure, hand-deploying the Garrett Screen over the bow on the crest of a wave (Cunliffe and Wurl, 2014) and further minimizing potential contamination (engines off, wheelhouse and afterdeck downwind) (Pereira et al., 2016). The SML samples were collected using the screen sampling technique (Garrett,

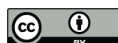

149 1965; Chen et al., 2016; Ma and Yang, 2023) directly off the ship's bow when  
150 conditions were calm. Briefly, a screen sampler with a 1.6 mm mesh of stainless-steel  
151 wire on a 40 cm × 40 cm stainless steel frame was used. The SML samples were  
152 collected in 500 mL brown sample bottles. The screen was held level and dipped into  
153 the sea surface, moved laterally to sample from an undisturbed film, and then  
154 withdrawn slowly from the surface. Repeated dipping (11 times, 600 mL) was  
155 conducted until the desired volume was collected (the depths of the SML samples  
156 ranged within 100–500 μm). The screening method is often applied during field studies  
157 because of its relative quickness and large sample volume compared to other techniques  
158 (Chen et al., 2016). The CO in seawater samples was measured first, immediately after  
159 collection. A comparison showed that screen-collected samples usually exhibit greater  
160 microlayer enrichment of gas than the plate-collected samples, indicating that the  
161 screen sampler might be more effective for in-situ measurements (Yang et al., 2001).  
162 CDOM, DOC, and Chl-*a* samples were filtered using 0.7 μm glass fiber filters (GF/F,  
163 Whatmann) and the filtrates were transferred to 60- and 40-mL brown glass bottles (pre-  
164 cleaned and pre-combusted) for later CDOM and DOC analyses. All samples were  
165 frozen (–20 °C) and protected from light. Upon arriving at the land laboratory, samples  
166 were analyzed as soon as possible. Sea-surface temperature and salinity were obtained  
167 from the sensors on the Seabird 911 CTD rosette. Meteorological data (e.g., wind speed  
168 and air temperature) were recorded simultaneously by a ship-borne weather instrument  
169 (Li et al., 2019, Table S1). The intensity of incident solar radiation was measured and  
170 recorded at half-hour intervals using an OL 756 UV-visible spectroradiometer (Li et al.,



2020, Table S1) fitted with an OL IS-270 2-inch integrating sphere (wavelength accuracy:  $\pm 0.15$  nm; wavelength repeatability:  $\pm 0.05$  nm; spectral radiance accuracy: 1%). Pearson's product-moment correlation was chosen to identify the relationships between parameters and calculated at the confidence level of 95%.

### 2.3 Photoexposure experiment

The **in-situ** natural sunlight incubation experiment was conducted to estimate the CO photoproduction rates in different seawater layers. SSW and SML samples for photochemical incubation were collected from stations **B1 and C4, as well as E2, FJ5, P1, and P7, located in the YS and the ECS, respectively.** SML and SSW (5 m below seawater surface) samples (SSW: 2 L; SML: 500 mL) were passed through a 0.22  $\mu$ m PES filters (Pall Corp. Port Washington, NY, USA) immediately to remove the majority of the bacteria and was then placed in an acid-washed and pre-combusted brown glass bottle (**2 L**) in a natural sunlight incubation. Photo incubation experiments were conducted on the ship immediately after sample collection. To measure the photoproduction at solar radiation production rates of CO, **the quartz tubes** were treated as follows: (1) uncovered quartz tubes exposed to full-spectrum irradiation; (2) quartz tubes wrapped in multiple layers of aluminum foil to eliminate all light transmission. Treatment (2) was subtracted from light-exposed treatments to remove the fraction of CO produced by dark production. In addition, filtered samples from each site were placed in six 80 mL optically transparent quartz tubes (acid-washed and pre-combusted) and sealed without headspace or air bubbles. The quartz tubes were positioned under



192 the irradiation source to maximize the exposure of the sample; the water depth in each  
193 tube was 5 cm (i.e., the diameter of the tube). Both quartz tubes (SML and SSW) were  
194 irradiated for 4 hours and were exposed to direct solar irradiation while being held in a  
195 water bath with circulating seawater. The change in the CO photoproduction with time  
196 can be seen as a constant due to the relatively small amount of total radiation during the  
197 short exposure time. The intensity of incident solar radiation was measured and  
198 recorded at half-hour intervals using an OL 756 UV-visible spectroradiometer (Li et al.,  
199 2020) fitted with an OL IS-270 2-inch integrating sphere (wavelength accuracy:  $\pm 0.15$   
200 nm; wavelength repeatability:  $\pm 0.05$  nm; spectral radiance accuracy: 1%, Table S1).

#### 201 2.4 Microbial Consumption and dark production experiments

202 Six stations were selected to determine the microbial consumption rates of CO  
203 (YS: stations A1, B1 and C4; ECS: stations E2, T2 and S6). CO concentrations of  
204 seawater samples were measured immediately upon collection from the SSW and the  
205 SML and used as background values. Seawater was used to fill 1 L glass syringes (with  
206 a 3-way nylon valve) pre-cleaned with 10% HCl-Milli-Q water and Milli-Q water until  
207 headspace-free, and wrapped with Aluminum-foil. The syringes were immersed in a  
208 shallow tank of flowing water which were continuously pumped from the sea in order  
209 to keep the water temperature of incubation experiments to those of the ambient surface  
210 seawater. Each time series of sampling consisted of 4–5 points, and the data from each  
211 time series were fitted exponentially to obtain the consumption rate constant ( $k_{\text{bio}}$ ).

212 Shipboard incubations were conducted to measure CO dark production rates.



213 According to Zhang et al. (2008), the dark production is the abiotic dark production.  
214 Seawater was firstly filtered through 0.45 and 0.2 µm polyethersulfone membranes and  
215 bubbled with CO-free gas to reduce the background CO values before being put into  
216 the 1 L syringes as previously described. Then syringes were rinsed with the sample  
217 water and then overflowed with the sample by 2 times their volumes before they were  
218 closed without headspace. All cultures were conducted in duplicate and placed in the  
219 same incubator. The water bath was completely darkened with opaque foam and black  
220 garbage bags. Samples for measurement were taken from the 1 L syringes every 1–4 h  
221 by syringe, taking care to evacuate the headspace after each sampling. The dark  
222 production incubations were used to eliminate the effect of dark production from the  
223 microbial CO consumption measurements.

## 224 2.5 Determination of [CO]

225 A TA3000R trace gas analyzer (Ametek, USA) was used to measure CO  
226 concentrations in the atmosphere and seawater with a lower detection limit of 10 ppbv.  
227 Before analysis, the instrument was calibrated using a CO standard gas (nominal  
228 concentration: 100 ppbv in zero-grade air; analytical accuracy: ± 2%, State Center for  
229 Standard Matter, China). The calibration was repeated every six hours during  
230 measurements. The mixing ratio of the CO in the atmosphere was obtained by injecting  
231 atmospheric samples from the gas-tight syringe directly into the instrument. The overall  
232 uncertainty of the atmospheric CO measurements was estimated to be 8% at a typical  
233 mixing ratio of 100 ppbv, including the contributions of instrument accuracy, carrier

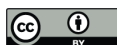

234 gas, and calibration gas. CO in seawater was measured using the headspace equilibrium  
235 method (Xie et al., 2002), wherein a 50 mL sample bottle was filled with seawater  
236 sample and sealed (as above), and then an equivalent amount of the seawater sample  
237 was replaced with 8 mL of high purity nitrogen using a gas-tight syringe. The  
238 samples were then shaken at 300 r min<sup>-1</sup> for 5 min to ensure that the nitrogen-filled  
239 headspace in the bottle reached gas-liquid equilibrium before 6 mL of the equilibrated  
240 gas was extracted using a gas-tight syringe and injected through a PTFE hydrophobic  
241 filter membrane (Millipore, USA) into the TA3000R trace gas analyzer for  
242 determination (the PTFE filter membranes were set up to prevent the potential entry of  
243 liquid water). The measured equilibrated headspace mixing ratio of CO (ppbv) was  
244 corrected using the saturated water vapor pressure and standard atmospheric pressure  
245 (Stubbins et al., 2006) and then converted to obtain the concentration of dissolved CO  
246 (nmol L<sup>-1</sup>) in seawater (eq. 4). The method's lower detection limit was 0.02 nmol L<sup>-1</sup>,  
247 with an analytical accuracy of better than 10%.

248 The daily fluxes (μmol m<sup>-2</sup> d<sup>-1</sup>) of CO in the YS and the ECS were calculated  
249 using the method reported by Stubbins et al. (2006) and Yang et al. (2011), based on  
250 the hourly flux (μmol m<sup>-2</sup> h<sup>-1</sup>). These hourly fluxes were examined on the scale of  
251 individual days by plotting hourly fluxes against the time of day. Days without full  
252 coverage of diurnal variations were discarded, leaving 4 d of data in the final analysis.  
253 The area under each daily curve was calculated (OriginPro 8.0) to give daily CO  
254 emissions.

255 The two-layer model proposed by Liss and Merlivat (1986) was used to calculate

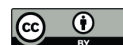

256 the instantaneous sea-to-air flux of CO according to the following equation:

$$257 \quad F = k([CO]_{\text{surf}} - [CO]_{\text{eq}}) \quad (1)$$

258 where  $F$  refers to the sea-to-air flux of CO ( $\text{nmol m}^{-2} \text{h}^{-1}$ ); and  $k$  is the gas transfer  
259 coefficient ( $\text{cm h}^{-1}$ ) as a function of wind speed  $u$  ( $\text{m s}^{-1}$ ) and the Schmidt number of  
260 CO ( $Sc$ ). In this paper, we used empirical formula E2011 (Edson et al., 2011), which  
261 applies to wind speeds from 0 to  $18 \text{ m s}^{-1}$  (Wind speed ranged from  $0.68 \text{ m s}^{-1}$  to  $12.00$   
262  $\text{m s}^{-1}$ ), to calculate the gas transfer coefficient as follows:

$$263 \quad k = (0.029u^3 + 5.4) (Sc/660)^{-1/2} \quad (2)$$

264 The Schmidt number of CO was referenced from the research of Zafiriou et al.  
265 (2008):

$$266 \quad Sc = -0.0553t^3 + 4.3825t^2 - 140.07t + 2134 \quad (3)$$

267 where  $t$  is seawater temperature ( $^{\circ}\text{C}$ ).

268  $[CO]_{\text{surf}}$  represents the initial concentration of CO in the surface seawater,  
269 calculated by the following equation:

$$270 \quad [CO]_{\text{surf}} = p m_a (\beta p V_w + V_a) / (RT V_w) \quad (4)$$

271 where  $P$  is the standard atmosphere pressure (atm) and  $m_a$  represents the concentration  
272 of CO in the headspace when the sample reaches equilibrium.  $\beta$  is the Bunsen solubility  
273 coefficient which is dependent on salinity and temperature (Wiesenburg and Guinasso,  
274 1979).  $V_w$  and  $V_a$  are the volumes of seawater and headspace in the sample bottle,  
275 respectively.  $T$  is temperature (in Kelvin) and  $R$  is the gas constant with the value of  
276  $0.08206 \text{ atm L (mol K)}^{-1}$ .

277  $[CO]_{\text{eq}}$  represents the concentration of CO in seawater when atmospheric CO is at



278 equilibrium with the seawater, calculated by the following equation:

$$279 \quad [\text{CO}]_{\text{eq}} = ([\text{CO}]_{\text{atm}} \times \beta) / M \quad (5)$$

280 where  $[\text{CO}]_{\text{atm}}$  indicates the mixing ratio of CO in the atmosphere (ppbv); and M is the  
281 molar volume of CO under standard pressure and temperature (25.0941 L mol<sup>-1</sup>).  
282 According to the error propagation equation (Nelson et al., 1998), the measurement  
283 uncertainty for atmospheric CO can cause an error of 4% in calculating the sea-to-air  
284 flux. Most of the error (91%) comes from the uncertainty in the gas transfer coefficient  
285 (k).

286 The turnover time of the photochemical production ( $\tau_{\text{prod}}$ ) and biological  
287 consumption ( $\tau_{\text{cons}}$ ) in the SML was calculated by the following equations (Yang et al.,  
288 2005; Yang and Tsunogai, 2005;):

$$289 \quad \tau_{\text{prod}} = [\text{CO}] \text{ in SML} / \text{photochemical CO production rate in SML} \quad (6)$$

$$290 \quad \tau_{\text{cons}} = 1 / k_{\text{CO}} \text{ in SML} \quad (7)$$

## 291 *2.6 Determination of CDOM absorption*

292 The Napierian absorption coefficients of CDOM ( $a_{\text{CDOM}}(\lambda)$  (m<sup>-1</sup>)) were calculated  
293 as follows:

$$294 \quad a_{\text{CDOM}}(\lambda) = 2.303 A_{\text{CDOM}}(\lambda) / L \quad (8)$$

295 where  $A_{\text{CDOM}}(\lambda)$  is the absorbance of the sample at wavelength  $\lambda$ ; and L is the cell  
296 pathlength of the quartz cuvette in meters (0.1 m; Stedmon and Markager, 2003). The  
297  $a_{\text{CDOM}}(254)$  (m<sup>-1</sup>) was chosen to characterize CDOM abundance.

298 The spectral slope of the absorption spectrum was obtained by nonlinear fitting of



the absorption coefficient according to the following equation (Stedmon and Markager, 2003):

$$a_{\text{CDOM}}(\lambda) = a_{\text{CDOM}}(\lambda_0) \exp[-S(\lambda - \lambda_0)] + K \quad (9)$$

where  $a_{\text{CDOM}}(\lambda)$  and  $a_{\text{CDOM}}(\lambda_0)$  are the Napierian absorption coefficients at wavelengths  $\lambda$  and  $\lambda_0$ ;  $\lambda_0$  is the reference wavelength;  $S$  is the spectral slope of the absorption spectrum; and  $K$  represents the background parameters with CDOM removed. The specific UV absorbance ( $\text{SUVA}_{254}$ ) can be used to measure aromaticity (Weishaar et al., 2003) and molecular weight (Chowdhury, 2013) of DOM, with higher values generally indicative of higher aromaticity.  $\text{SUVA}_{254}$  is calculated by dividing the absorbance at 254 nm by DOC. Detailed Chl-*a*, DOC, fluorescence DOM (FDOM), dissolved oxygen (DO), and wavelength ( $\lambda$ )-dependent absorption coefficients of CDOM ( $a_{\text{CDOM}}(\lambda)$ ) were determined in the laboratory using published techniques. See supplementary information (Section S1) for analytical details.

## 2.7 Enrichment factors

The enrichment factor (EF) in the SML is defined as follows:

$$\text{EF} = C_{\text{M}}/C_{\text{S}} \quad (10)$$

where  $C_{\text{M}}$  is the concentration of any substance in the SML, and  $C_{\text{S}}$  is its concentration in the SSW. If the EF of a substance is greater than 1.0, that substance is considered enriched, and if it is less than 1.0, it is considered depleted (Chen et al., 2016). Higher EF mean values of CO and DOM indicated their concentrations were greater in SML than that in the SSW.



## 320 2.8 Statistical analyses

321 The correlation coefficient ( $r$ ) and probability ( $P$ ) values were used to evaluate the  
322 goodness-of-fit. The correlation matrix, analysis of variance, and principal components  
323 analysis were conducted with SPSS version 18.0 (SPSS Inc., Chicago, IL, USA) to test  
324 possible relationships between the DOM parameters and environmental factors.  $P$   
325 values  $\leq 0.05$  were considered significant.

## 326 3. Results

### 327 3.1 Environmental Factors and CO Concentration in the SSW and the SML

328 Surface water temperature increased from 2.08 °C at YS station H12 to 23.8 °C at  
329 ECS station E7 (mean value:  $11.85 \pm 4.53$  °C, Fig. 2). Surface salinity increased from  
330 28.85 at CRE station E1 to 34.62 at ECS station E7 (mean value:  $32.35 \pm 1.17$ ). Wind  
331 speed during sampling ranged from 0.68 m s<sup>-1</sup> at station H9 to 12.00 m s<sup>-1</sup> at station FJ1  
332 (mean value:  $6.09 \pm 2.50$  m s<sup>-1</sup>). In recent years, bubble-mediated enhancement of the  
333 transfer velocity,  $k$ , which exhibits a relationship with wind speed, has emerged as a  
334 key issue for flux parameterization in high-wind regions (Edson et al., 2011). The  
335 integrated solar irradiance (mean value:  $14.09 \pm 114.64$  kW m<sup>-2</sup>) during the in-situ  
336 incubation ranged from -111.8 kW m<sup>-2</sup> at YS station H5 to 417.9 kW m<sup>-2</sup> at ECS station  
337 F4.

338  $a_{CDOM}(254)$  in the YS (SSW:  $3.59 \pm 0.89$  m<sup>-1</sup>; SML:  $4.78 \pm 0.85$  m<sup>-1</sup>) was higher  
339 than that in the ECS (SSW:  $1.64 \pm 0.72$  m<sup>-1</sup>; SML:  $4.70 \pm 3.35$  m<sup>-1</sup>) in both the SML



340 and the SSW.  $a_{CDOM}(254)$  in the SML ( $4.74 \pm 2.50 \text{ m}^{-1}$ ) showed higher values compared  
341 to the SSW ( $2.52 \pm 1.26 \text{ m}^{-1}$ ) during winter. In addition, no significant difference was  
342 observed between  $a_{CDOM}(254)$  in the SML and SSW ( $n = 52$ ,  $p = 0.76$ , paired t-test).  
343 During the study period,  $[CO]_{sur}$  was particularly high at the station F4 ( $3.61 \text{ nmol L}^{-1}$ ,  
344 sampling time: 12:43) in the SML and relatively high at the station P6 ( $2.81 \text{ nmol L}^{-1}$ ,  
345 sampling time: 14:36) in the SSW (Fig. 2). The maximum  $[CO]_{sml}$  was observed during  
346 daytime (sampling time: 12:43, Station F4:  $3.61 \text{ nmol L}^{-1}$ ), but the minimum  $[CO]_{sml}$   
347 was observed during night (sampling time: 22:22, Station E2:  $0.59 \text{ nmol L}^{-1}$ ). No  
348 significant difference was observed between  $[CO]$  in the SML (mean value:  $1.54 \text{ nmol}$   
349  $\text{L}^{-1}$ ) and the SSW (mean value:  $1.23 \text{ nmol L}^{-1}$ ) ( $n = 52$ ,  $p = 0.11$ , Wilcoxon signed-rank  
350 test).  $[CO]$  mean value in the YS (SSW:  $1.23 \pm 0.40 \text{ nmol L}^{-1}$ ; SML:  $1.54 \pm 0.68 \text{ nmol}$   
351  $\text{L}^{-1}$ ) were similar to the concentration observed in the ECS (SSW:  $1.23 \pm 0.45 \text{ nmol L}^{-1}$ ;  
352 SML:  $1.55 \pm 0.92 \text{ nmol L}^{-1}$ ) between the SML and the SSW, respectively. The  
353 stronger negative linear relationship observed between salinity and  $a_{CDOM}(254)$  was  
354 observed in the SSW ( $r = -0.716$ ,  $n = 52$ ,  $p < 0.01$ ) where the influence of terrestrial  
355 input in this water layer was higher than that in the SML ( $r = -0.038$ ,  $n = 52$ ).

### 356 *3.2 Variations in parallel factor analysis (PARAFAC)-derived fluorescent DOM* 357 *components and factors controlling the composition of the fluorescent components*

358 The three fluorescent DOM components were determined statistically by  
359 conducting **PARAFAC** of the samples (Table S1; Fig. S1). Component C1 was apparent  
360 with excitation and emission peaks at 275 nm and 335 nm, respectively, and was likely



361 a tryptophan-like peak T (Yamashita et al., 2017). C2 exhibited excitation/emission  
362 ( $E_x/E_m$ ) maxima at 350 nm/455 nm and similar to peak C derived from terrestrial humic  
363 sources (Coble and Paula, 2007). Peak C has often been observed in various coastal  
364 (Coble, 1996) and oceanic environments (Yamashita et al., 2017). C3 appeared as a  
365 fluorophore with  $E_x/E_m$  wavelengths of 320 nm/390 nm and was similar to marine  
366 humic-like components from coastal environments (Yamashita and Jaffé, 2008).

### 367 3.3 Variation and enrichment of CO, CDOM, DOC, and FDOM in the SML

368 [CO] showed relatively higher mean value in the SML, where its EFs ranged from  
369 0.34 to 3.6 and it had a mean EF value of  $1.3 \pm 0.7$  (Fig. 3). Up to 92% of CDOM  
370 samples were enriched in the SML, with the average EF value of  $a_{CDOM}(254)$  of  $2.2 \pm$   
371 1.2, ranging between 0.4 and 6.7. The absorption of CDOM and the fluorescence  
372 intensity of FDOM components in the SML were positively correlated with their  
373 respective SSW values (Fig. S2), indicating that transport of DOM from the SSW to  
374 the SML is an important pathway. The EFs of CO, CDOM, and DOC in the SML were  
375 generally higher in the ECS than those in the YS (Fig. 2 and Fig. S3). The EF of C3,  
376 C1 and C2 were  $1.6 \pm 0.7$ ,  $1.4 \pm 0.6$ , and  $1.3 \pm 0.5$ , respectively. Furthermore, relatively  
377 high CDOM absorption slope mean values ( $S_{275-295}$  and  $S_R$ ) were observed in the SML  
378 (SSW:  $S_{275-295}$ :  $0.0206 \pm 0.0068$  and  $S_R$ :  $1.48 \pm 0.49$ ; SML:  $S_{275-295}$ :  $0.0210 \pm 0.0055$   
379 and  $S_R$ :  $1.53 \pm 0.22$ ), indicating that CDOM in the SML experienced more significant  
380 photodegradation than that in the SSW. The EF of CO in the daytime (mean value:  $1.5$   
381  $\pm 0.8$ , 7:00-19:00) was 1.6 times higher than that in the nighttime (mean value:  $0.9 \pm$



0.3, 19:00-7:00) (Fig. 3b)). The EF of CDOM in the daytime (mean value:  $2.3 \pm 11.4$ ) was 1.1 times higher than that in the nighttime (mean value:  $2.1 \pm 0.9$ ) (Fig. 3b)). In addition,  $[\text{CO}]_{\text{sur}}$  in the daytime (mean value:  $1.39 \pm 0.47 \text{ nmol L}^{-1}$ ) was 1.3 times higher than that in the nighttime (mean value:  $1.05 \pm 0.22 \text{ nmol L}^{-1}$ ) and  $[\text{CO}]_{\text{sml}}$  in the daytime (mean value:  $1.88 \pm 0.77 \text{ nmol L}^{-1}$ ) was 2.0 times higher than that in the nighttime (mean value:  $0.95 \pm 0.29 \text{ nmol L}^{-1}$ ), likely due to CO photoproduction in the daytime.

### 3.4 Variation of sea-to-air flux of CO

The atmospheric mixing ratios ( $[\text{CO}]_{\text{atm}}$ ) of the eastern marginal seas of China ranged from 239 to 900 ppbv with an average of  $602 \pm 164 \text{ ppbv}$  ( $n = 69$ ; Fig. 2) during winter.  $[\text{CO}]_{\text{atm}}$  measured at the station A1 in the YS (the maximum concentration, sampling time: 5:25) was nearly four times than that measured at the station T2 in the ECS (the minimum concentration, sampling time: 21:12). YS exhibited higher CO mixing ratios (mean value: 423 ppbv in 2007; mean value: 657 ppbv in 2019) than the ECS (mean value: 252 ppbv in 2007; mean value: 476 ppbv in 2019) in this study and a previous study (Yang et al., 2010), indicating  $[\text{CO}]_{\text{atm}}$  showed relatively higher values in the YS than the ECS, and  $[\text{CO}]_{\text{atm}}$  showed a significant decreasing trend from the northern regions to the southern regions in the eastern marginal seas of China (Fig. 2). The higher  $[\text{CO}]_{\text{atm}}$  at the northern stations (the YS) were representative of the regionally polluted continental outflow air mass due to the anthropogenic activity in East Asia.

The instantaneous sea-to-air fluxes of CO ranged from  $-1.75$  to  $39.78 \text{ nmol m}^{-2} \text{ h}^{-1}$



<sup>1</sup> in the SML ( $4.96 \pm 7.35 \text{ nmol m}^{-2} \text{ h}^{-1}$ ) and from  $-0.04$  to  $34.18 \text{ nmol m}^{-2} \text{ h}^{-1}$  in the SSW ( $7.40 \pm 7.31 \text{ nmol m}^{-2} \text{ h}^{-1}$ ). Higher fluxes generally occurred in the southernmost part of the survey area in the ECS (Fig. 2). Although the concentrations of  $[\text{CO}]_{\text{atm}}$  in the northern region were generally higher than those in the southern region, the sea-to-air fluxes of CO in the SML in the ECS ( $6.94 \pm 9.61 \text{ nmol m}^{-2} \text{ h}^{-1}$ ) were 3.5 times higher than that in YS ( $1.97 \pm 2.11 \text{ nmol m}^{-2} \text{ h}^{-1}$ ), indicated that  $[\text{CO}]_{\text{atm}}$  did not followed the sea-to-air flux of CO shown in Fig. 2. Therefore,  $[\text{CO}]_{\text{atm}}$  values in the YS were heavily depend on land anthropogenic input, but in the ECS, the distribution of  $[\text{CO}]_{\text{atm}}$  were more dependent on the sea-to-air flux of CO.

### 3.5 CO production and consumption

The photoproduction rate of CO ( $K_{\text{photo}}$ ) under solar irradiance ranged from 0.708 to  $1.05 \text{ nmol L}^{-1} \text{ h}^{-1}$  (mean  $\pm$  SD:  $0.860 \pm 0.121 \text{ nmol L}^{-1} \text{ h}^{-1}$ ) and 0.710 to  $1.27 \text{ nmol L}^{-1} \text{ h}^{-1}$  (mean  $\pm$  SD:  $1.03 \pm 0.164 \text{ nmol L}^{-1} \text{ h}^{-1}$ ) during the in-situ incubation experiments in the SSW and the SML, respectively, as shown in Fig. 4a) and Table 2. The mean value of  $K_{\text{photo}}$  in the SML was slightly higher than that in the SSW, but the  $\tau_{\text{prod}}$  was lower in the SML (1.35 h) than in the SSW (1.22 h). In addition, a significant relationship was observed between the light-normalized CO production rates between the SML and the SSW ( $r = 0.408$ ,  $p < 0.01$ ,  $n = 6$ ) during winter. The maximum  $k_{\text{bio}}$  value appeared at the near-shore station B1 and the minimum value at the off-shore station S6 in the SML.

$k_{\text{bio}}$  in the SML and the SSW ranged between 1.43 and  $3.78 \text{ d}^{-1}$  (average  $\pm$  SD:

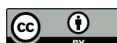

2.76 ± 0.80 d<sup>-1</sup>) and between 1.17 and 3.48 d<sup>-1</sup> (average ± SD: 2.46 ± 0.88 d<sup>-1</sup>), respectively, higher than those observed in the Arctic marginal sea (mean ± SD: 0.96 ± 0.29 d<sup>-1</sup>; Xie et al., 2005), but lower than those in the Northwest Atlantic Ocean (mean ± SD: 6.24 ± 5.76 d<sup>-1</sup>; Xie et al., 2005) and the China shelf sea (mean ± SD: 4.80 ± 1.82 d<sup>-1</sup>; Zhang et al., 2019). Thus the bacterial consumption rate constant of CO was low in oligotrophic open ocean regions but higher in productive coastal areas. The turnover times driven by microorganism ( $\tau_{\text{bio}}$ ), i.e., the reciprocal of  $k_{\text{bio}}$ , were 8.9 ± 2.9 h and 11.9 ± 5.4 h in the SML and the SSW, respectively. Since the CO photoproduction rate at the near-shore station B1 was lower than that of the near-shore station E2 and its CO consumption ability was much stronger, the seawater concentration of CO at coastal station E2 (SSW: 1.62 nmol L<sup>-1</sup>) was higher than that at coastal station B1 (SSW: 1.51 nmol L<sup>-1</sup>). The microbial consumption rates of CO in the SML varied greatly (average of 0.18 ± 0.05 nmol L<sup>-1</sup> h<sup>-1</sup>), higher than the average in the SSW (0.13 ± 0.03 nmol L<sup>-1</sup> h<sup>-1</sup>) (Fig. 4b).

### 3.6 Primary factors controlling the distribution of the optical parameters of DOM and CO and their EFs

Negative relationships were observed between salinity and  $a_{\text{CDOM}}(254)$  (SSW:  $p < 0.01$ ,  $r = -0.715$ ,  $n = 62$ ; SML:  $p = -0.045$ ,  $n = 52$ ),  $a_{\text{CDOM}}(355)$  (SSW:  $p < 0.01$ ,  $r = -0.622$ ; SML:  $r = -0.146$ ), and the C1 (SSW:  $p < 0.01$ ,  $r = -0.758$ ,  $n = 62$ ; SML:  $r = -0.158$ ,  $n = 52$ ), C2 (SSW:  $p < 0.01$ ,  $r = -0.341$ ; SML:  $r = -0.106$ ), and C3 (SSW:  $p < 0.01$ ,  $r = -0.851$ ; SML:  $r = -0.154$ ) components in SSW and SML (Table 1). High and



low fluorescence levels of these three components were usually found at sites with low and high salinities, respectively (Fig. 2). These results indicated that riverine inputs mainly determined the distributions of CDOM and FDOM. Furthermore, although significant CO production via CDOM photodegradation has been recorded in estuarine systems (Stubbins et al., 2011), no significant relationships were observed between  $[CO]$  and  $a_{CDOM}(254)$  in either the SSW or the SML in our study regions.  $a_{CDOM}(254)$  ( $p < 0.01$ ,  $r = -0.419$ ,  $n = 52$ ) and the marine humic-like C3 ( $p < 0.01$ ,  $r = -0.201$ ,  $n = 52$ ) were both negatively correlated with the flux of CO in the SML (Fig. 5a and b). The flux of CO was positively related to temperature ( $p < 0.01$ ,  $r = 0.511$ ,  $n = 62$ ) and salinity ( $p < 0.01$ ,  $r = 0.338$ ,  $n = 62$ ) in the SSW (Fig. 5), but the EF of CO showed no significant relationship with surface water temperature, salinity, or mean wind speed during sampling (Fig. 5d and 5f).

## 4. Discussion

### 4.1 CO and DOM distribution and enrichment in the SML

The average concentration of  $[CO]_{sur}$  ( $1.23 \text{ nmol L}^{-1}$ ) in the eastern marginal seas of China was similar to that observed in the Bohai Sea and the YS during autumn (Zhang et al., 2019,  $1.22 \text{ nmol L}^{-1}$ ) and the Arctic waters of the Amundsen Gulf (Beaufort Sea) in September/October (Xie et al., 2009,  $0.17\text{--}1.34 \text{ nmol L}^{-1}$ ), but was relatively lower than the Eastern Indian Ocean (Xu et al., 2023,  $1.92 \text{ nmol L}^{-1}$ ). Eastern Indian Ocean, on the other hand, had salinity close to 34 and the temperature was relatively high (around  $29^{\circ}\text{C}$ ) in autumn 2020 (Xu et al., 2023). Tropical and subtropical



466 open ocean regions were generally less affected by terrestrial influences compared to  
467 estuarine, coastal and high-latitude areas. CO production and fluxes normalized to  
468 discharge is generally higher in warmer waters (Kieber et al., 2014), presumably also  
469 partly due to temperature controls on dissolution (Johnson et al., 1996). Therefore, the  
470 relatively higher concentration of  $[CO]_{sur}$  in open ocean might be characterized by  
471 the relatively high seawater temperature.

472  $[CO]_{sml}$ ,  $[CO]_{sur}$ , DOC and CDOM decreased from coastal regions to open ocean  
473 and decreased from the northern sampling area (the YS) to the southern sampling area  
474 (the ECS) in both the SSW and the SML (Fig. 2), which was likely due to the input  
475 from the land-based sources (Yang et al., 2022). However, CO, CDOM, and FDOM  
476 were more frequently enriched in the ECS (Fig. 2). Although CDOM originated from  
477 allochthonous terrestrial sources in the ECS and the YS (Yang et al., 2021), CDOM in  
478 the ECS was more dominated by photochemical degradation processes, while CDOM  
479 in the YS was more influenced by complicated photochemical–biological coupling  
480 processes (Zhu et al., 2018).  $a_{CDOM}(254)$  and all three fluorescence components were  
481 also positively correlated with  $SUVA_{254}$  (Table 1), indicating that CDOM showed  
482 higher aromaticity and humification in the eastern marginal seas of China. In addition,  
483 we observed a significant positive relationship between  $a_{CDOM}(254)$  and Chl-*a* in the  
484 SSW ( $p < 0.01$ ,  $r = 0.333$ ,  $n = 62$ ), suggesting that phytoplankton biomass and biological  
485 processes played an essential role in generating new CDOM and controlling the  
486 distribution of CDOM in winter. The EF of marine humic-like Component 3 was  
487 significantly higher than the other fluorescence components (1.6 vs. 1.4 and



1.3), indicating that in-situ autochthonous DOM was more strongly enriched in the SML than terrestrial DOM. Thus CO, CDOM, and FDOM were more frequently enriched in the open ocean which were more attributed to the significant local production.

$[CO]_{sur}$  and  $[CO]_{sml}$ , and the EFs of CO showed strong diurnal fluctuations in our study (Fig. 3, Section 3.1 and 3.3). Similar diurnal fluctuations in  $[CO]_{sur}$  have also been observed in other areas (Ren et al., 2010; Yang et al., 2010; Yang et al., 2011), likely resulting from the sunlight-induced photochemical production of CO during daytime and the stronger microbial consumption at night. Significant positive relationships were observed between the EFs of CO and solar irradiance (Table 3). The higher EF values of CO also occurred in the daytime, suggesting that sufficient light and higher temperatures combined to facilitate the photoproduction of CO and its enrichment in the SML.

#### *4.2 Photochemical CO production and biological CO consumption in the SML and the SSW*

The mean photoproduction rate of CO in the SML was 1.1 times higher than that in the SSW in the eastern marginal seas of China, and CO in our study region showed a longer turnover time than the findings of Sugai et al. (2021) in Sagami Bay, Japan ( $\tau_{prod} = 0.09$  h), which is probably due to relatively low photochemical CO production in the SML and stronger enrichment to long term storage of CO. The dark production rates of CO ( $k_{dark}$ ) ranged from  $-0.01$  to  $4.81 \text{ nmol L}^{-1} \text{ d}^{-1}$ , with a mean value of  $1.25 \pm$



509 2.34 nmol L<sup>-1</sup> d<sup>-1</sup> in the SSW. Zhang et al. (2008) observed that the dark production of  
510 CO exhibited a positive linear correlation with the abundance of CDOM, and terrestrial  
511 DOM was more efficient at dark producing CO than marine DOM. However, no  
512 significant dark production was observed in the SML water samples, which indicated  
513 that dark production may be the main factor controlling CO concentrations in deeper  
514 seawater.

515 The turnover times driven by sea-to-air exchange were much longer than those of  
516 microbial consumption, about 219 h and 1029 h in the SSW and SML, respectively.  
517 This indicated that microbial removal of CO was much faster than sea-to-air exchange,  
518 which may make the latter a subordinate pathway for CO removal in our study regions.  
519 The relative intense UV light at the surface ocean might influence marine microbial  
520 composition and inhibit microbial consumption (Cory and Kling, 2018). However,  
521 relatively higher microbial consumption rate of CO in marine systems has been  
522 historically attributed to higher Chl-*a*, but lower salinity level (Xie et al., 2009; Yang et  
523 al., 2010; Xu et al., 2023). In addition, the heterotrophic bacterial abundance in the SML  
524 was ~ 7.5 times greater than in the SSW and the ECS in March 2017 (Sun et al., 2020).  
525 The SML is an aggregate-enriched biofilm environment with distinct microbial  
526 communities, the diversity of which can differ significantly from underlying waters  
527 (Liss and Duce, 2005; Cunliffe et al., 2013). This higher abundance of bacteria could  
528 result in the rapid consumption of CO, along with a wide variety of other organic  
529 substances in the SML. Thus the CO consumption rate in the SML and the SSW seemed  
530 to be, on the whole, less affected by UV radiation. Moreover, elevated nutrient



531 concentrations can stimulate the growth of phytoplankton, biological activity, and  
532 subsequently lead to the abundant production of fresh autochthonous DOM in the SML  
533 (Yang et al., 2022). Therefore, compared to the SSW, the elevated DOM concentrations  
534 and bacteria abundances could enhance the influences of photoproduction and  
535 microbial consumption on CO cycling processes in the SML.

#### 536 *4.3 Implications of CO sea-to-air exchange and emission to the atmosphere*

537 Based on the areas of the ECS ( $7.7 \times 10^5 \text{ km}^2$ ) and YS ( $3.8 \times 10^5 \text{ km}^2$ ) and their  
538 respective CO sea-to-air fluxes, the releases of CO from the ECS and YS to the  
539 atmosphere were estimated to range from 3 to 230 Mg CO-C month<sup>-1</sup> (Mg =  $10^6 \text{ g}$ ) and  
540 from -0.2 to 880 Mg CO-C month<sup>-1</sup>, with averages of 70 Mg CO-C month<sup>-1</sup> and 10 Mg  
541 CO-C month<sup>-1</sup>, respectively. Clearly, the average annual release of CO to the  
542 atmosphere in the ECS was much higher than (nearly 7 times) that in the YS. Yang et  
543 al. (2010) suggested that the  $[\text{CO}]_{\text{sur}}$  was the main factor affecting the sea-air flux of  
544 CO. However,  $[\text{CO}]_{\text{sur}}$  in the ECS was similar to that in the YS. As noted above, the  
545 most likely sources of CO in the SML of these seas are in-situ photoproduction from  
546 CDOM and/or vertical export via underlying water. Fig. 2 shows the enhanced higher  
547 flux of CO observed in the SML in Changjiang Estuary matched the lowest  
548 salinity concentration. Thus the fresh input of the Changjiang River and the mixing  
549 processes appear to also promote the sea-to-air CO flux in the SML in the ECS than  
550 that in the YS.

551 Surface-active surfactants are ubiquitous and accumulate in the uppermost < 1000



552  $\mu\text{m}$  in seawater (Rickard et al., 2019), where they slow the rate of gas exchange between  
553 seawater and air (Cunliffe et al., 2013). Rickard et al. (2022) observed that the first-  
554 order estimates of the potential suppression of the gas transfer velocity ( $k_w$ ) by photo-  
555 derived surfactants 12.9%–22.2% in coastal North Sea water. The highest SML  
556 enrichments in surfactants have been seen in low productivity, oligotrophic regions  
557 away from terrestrial influences, where surfactants concentrations in SSW are generally  
558 low (Wurl et al., 2016). Pereira et al. (2018) also noted that the observed reduction in  
559 the air-sea  $\text{CO}_2$  exchange in the Atlantic Ocean was due to biological surfactants acting  
560 as physical barriers and altering turbulent transfer near the water surface. Therefore, the  
561 relatively lower fluxes of CO observed in the YS may be indicate seawater contains lots  
562 of surfactants in the SML. Despite the clear importance of surfactants at the air-sea  
563 interface, we did not conduct surfactant-specific analyses due to the analytical  
564 limitations. In our experiments, the CO flux varied by 131% in winter, the negative  
565 correlations between  $a_{\text{CDOM}}(254)$  and the sea-air flux of CO, and between marine  
566 humic-like C3 and the sea-air flux of CO suggested that CDOM concentration may  
567 reduce the CO sea-air gas exchange rate in our study regions (Fig. 5a and 5b). Therefore,  
568 due to the complexity of DOM pool the SML, and its resulting decreased sea-to-air flux  
569 of CO, more measurements are needed to validate our conceptual model and provide a  
570 better understanding of the flux measurements of CO in the SML.

#### 571 *4.4 Modeling of CO dynamics in the SML and the SSW*

572 All sources and sinks, including photoproduction and dark production, microbial



573 consumption and sea-air emission, should be considered in estimating CO dynamics in  
574 the SML and SSW (Fig. 6). The effective solar illumination period of each day was  
575 approximately 12 h, and based on this the average photoproduction rates in the SML  
576 and the SSW were calculated to be  $12.41 \pm 1.87 \text{ nmol L}^{-1} \text{ d}^{-1}$ ,  $10.32 \pm 1.48 \text{ nmol L}^{-1} \text{ d}^{-1}$ ,  
577 respectively. In the SSW, the ratio of photoproduction to dark production ( $1.88 \pm 2.89$   
578  $\text{nmol L}^{-1} \text{ d}^{-1}$ ) was about 4:1, and dark production accounted for about 15% of the total  
579 production. No dark production of CO was observed in the SML. CO photoproduction  
580 was lower in deeper water, while dark production was higher. The calculated  
581 contribution of dark production to CO production in this study was similar to that for  
582 the St. Lawrence estuary (14%; Zhang and Xie, 2012) but much lower than for the  
583 Eastern Indian Ocean (20%; Xu et al., 2023). These were because dark production needs  
584 to be given more weight in estimating its contribution to the total production of CO in  
585 the deeper waters of the ocean than in estuaries (Xu et al., 2023). The total removal  
586 rates of CO were about  $2.64 \text{ nmol L}^{-1} \text{ d}^{-1}$  and  $2.88 \text{ nmol L}^{-1} \text{ d}^{-1}$  in the SSW and the SML,  
587 respectively, including the microbial consumption rates of  $2.46 \pm 0.88 \text{ nmol L}^{-1} \text{ d}^{-1}$  and  
588  $2.76 \pm 0.80 \text{ nmol L}^{-1} \text{ d}^{-1}$  in the SSW and the SML, respectively. The sea-to-air exchange  
589 rates were  $0.18 \pm 0.18 \text{ nmol L}^{-1} \text{ d}^{-1}$  in the SSW and  $0.12 \pm 0.18 \text{ nmol L}^{-1} \text{ d}^{-1}$  in the SML.  
590 The turnover of CO occurred faster in the SML environment than in the SSW (~ 1.2  
591 times). Microbial consumption was the primary sink of CO, accounting for about 95%  
592 of CO removal, indicating that the biogeochemical cycling of CO is almost entirely  
593 contained within seawater and only a small amount of CO is released into the  
594 atmosphere (Xie et al., 2005; Yang et al., 2010; Zhang et al., 2019; Xu et al., 2023). The



595 production rates of CO in both SML and SSW significantly exceeds the loss rates, this  
596 could lead to accumulation of CO in these systems. Therefore, CO balance in the ECS  
597 and YS indicated that the underlying loss of CO (via sea-to-air flux and biodegradation)  
598 was slower than the production of CO in the SML, therefore a positive CO balance was  
599 maintained in the SML.

600 The average annual photoproduction, microbial consumption, and sea-to-air flux  
601 of CO in the SSW were about 3.02, 1.58, and 0.04 Gg CO-C month<sup>-1</sup>, respectively,  
602 based on the area of the survey region ( $\sim 1.2 \times 10^6$  km<sup>2</sup>, SSW  $\sim 10$  m). Conte et al.  
603 (2019) used the NEMO-PISCES model combined with original ocean CO data  
604 collected worldwide over the last 50 years, ultimately estimating that global emissions  
605 of CO to the atmosphere were 4.0 Tg CO-C yr<sup>-1</sup> (Tg = 10<sup>12</sup> g). Based on our data, we  
606 estimated the contribution of China's eastern marginal seas to global marine CO  
607 emissions via sea-to-air flux to be  $\sim 0.3\%$ , and the YS and the ECS occupy 2.7% of  
608 the global ocean area. The simulated surface CO concentrations and sea-to-air fluxes  
609 based on our measured values were much smaller than those simulated by Erickson  
610 (1989). In our study, CO produced can be rapidly consumed by microorganisms and  
611 only a small fraction was released into the atmosphere, which may explain why the  
612 relative contribution of the eastern marginal seas of China to atmospheric CO was much  
613 lower than the global level.

614 Notably, the enrichment of CO in the SML was more common during the daytime  
615 when photochemical processes were more active, but natural sunlight can inhibit the  
616 microbial consumption of CO. CO was maximal in the SML, leading to the significant



617 enrichment and supersaturation. CDOM in the SML experienced more significant  
618 photodegradation than that in the SSW as can be seen in Section 3.3. Moreover,  
619 researchers assumed that biological, chemical and physical processes in the SML are  
620 controlled by changes in DOM concentration at this uppermost thin boundary layer  
621 between the ocean and the atmosphere (Cunliffe et al., 2013). We found that  
622 autochthonous humic-like DOM was more enriched in the SML than terrestrial DOM,  
623 indicating that it could be an indispensable part of CO photoproduction (Yang et al.,  
624 2022). Solar irradiance was positively related to the EFs of CO (Table 3), suggesting  
625 that the integrated solar irradiance influenced CO enrichment in the SML. Moreover,  
626 we did discover the potential for CDOM accumulation in the SML to prevent CO  
627 emissions into the atmosphere (Section 4.3). Therefore, CDOM accumulation and the  
628 production rates of CO in the SML significantly exceeds the loss rates, this could lead  
629 to the significant accumulation of CO in the SML, especially in the daytime.

## 630 5. Conclusions

631 The present study represents the first comprehensive investigation of CO  
632 distribution, loss, and production processes in both the SML and SSW, as well as sea-  
633 to-air CO flux in the ECS and YS during winter.  $[CO]_{sur}$ ,  $[CO]_{sml}$ , CDOM, FDOM, and  
634 DOC were generally decreased from coastal regions toward open ocean. However, the  
635 EFs of CO, CDOM, FDOM, and DOC were significantly higher in offshore regions,  
636 suggesting that stronger enrichment processes in the SML are more prevalent in open  
637 waters compared to coastal areas. CDOM absorption slope mean values ( $S_{275-295}$  and  
638  $S_R$ ) demonstrated that CDOM in the SML underwent more substantial



639 photodegradation than that in the SSW. Notably, the EF of the marine humic-like C3  
640 was significantly higher than other fluorescence components, indicating that in-situ  
641 autochthonous DOM was more strongly enriched in the SML than terrestrial DOM.  
642 Significant negative correlations were observed between  $a_{CDOM}(254)$  and sea-to-air CO  
643 flux, as well as between sea-to-air CO flux and humic-like C3 in the SML, indicating  
644 that the open sea exhibit lower CDOM concentrations but higher gas transfer  
645 suppression of CO compared to nearshore waters, and that the enrichment of in-situ  
646 autochthonous DOM may regulate CO emissions to the atmosphere in the SML. The  
647 observed diurnal variability in CO EF led us to conclude that in-situ photoproduction  
648 processes play a crucial role in determining CO distribution within the SML. Our  
649 findings reveal a complex interplay between DOM enrichment and sea-air CO fluxes  
650 in the SML, the connection that should be incorporated into future budget models for  
651 accurate carbon cycling assessments in marine environments.

652

#### 653 **Author contribution**

654 Lin Yang: Conceptualization, Writing-Original Draft, Writing-Review and Editing

655 Peiyi Bian: Formal analysis

656 Jing Zhang: Writing-Review and Editing, Funding acquisition

657 Anja Engel: Writing-Review and Editing

658 Bin Yang: Writing-Review and Editing

659 Gui-Peng Yang: Writing-Review and Editing, Supervision

660

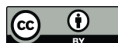

661    **Competing interests**

662    The authors declare that they have no known competing financial interests or personal  
663    relationships that could have appeared to influence the work reported in this paper.

664    **Acknowledgment**

665           We are grateful to the captain and crew of the R/V “*Dong Fang Hong 3*” for their  
666    help and cooperation during the in-situ investigation. This study was financially  
667    supported by the National Natural Science Foundation of China (Grant No. 42330402),  
668    and the National Key Research and Development Program (Grant No.  
669    2016YFA0601300).



## References

- 670  
671 Chen, Y., Yang, G., Xia, Q., Wu, G., 2016. Enrichment and characterization of dissolved  
672 organic matter in the surface microlayer and subsurface water of the South Yellow  
673 Sea. *Mar. Chem.* 182(Mar. 20), 1–13. doi: 10.1016/j.marchem.2016.04.001
- 674 Chowdhury, S., 2013. Trihalomethanes in drinking water: effect of natural organic  
675 matter distribution. *WATER SA*, 39, 1–7. doi: 10.4314/wsa.v39i1.1
- 676 Coble, P.G., 1996. Characterization of marine and terrestrial DOM in seawater using  
677 excitation-emission matrix spectroscopy. 51(4), 325–346. doi: 10.1016/0304-  
678 4203(95)00062-3
- 679 Coble, P.G., Paula, G., 2007. Marine optical biogeochemistry: the chemistry of ocean  
680 color. *Cheminform* 38(2), 402–418. doi: 10.1002/chin.200720265
- 681 Conte, L., Szopa, S., Séférian, R., Bopp, L., 2019. The oceanic cycle of carbon  
682 monoxide and its emissions to the atmosphere. *Biogeosciences*, 16(4), 881–  
683 902. doi: 10.5194/bg-16-881-2019
- 684 Cordero, P.R.F., Bayly, K., Leung, P.M., Huang, C., Greening, C., 2019. Atmospheric  
685 carbon monoxide oxidation is a widespread mechanism supporting microbial  
686 survival. *ISME J.* 13(14). doi: 10.1038/s41396-019-0479-8
- 687 Cory, R.M., Kling, G.W., 2018. Interactions between sunlight and microorganisms  
688 influence dissolved organic matter degradation along the aquatic continuum.  
689 *Limnol. Oceanogr. Lett.* 3(3), 102–116. doi: 10.1002/lol2.10060
- 690 Cunliffe, M., Engel, A., Frka, S., Gašparovi, B., Guitart, C., Murrell, J.C., Salter, M.,  
691 Stolle, C., Upstill-Goddard, R., Wurl, O., 2013. Sea surface microlayers: A unified  
692 physicochemical and biological perspective of the air-ocean interface. *Prog.*  
693 *Oceanogr.* 109, 104–116. doi: 10.1016/j.pocean.2012.08.004



- 694 Cunliffe, M., Upstill-Goddard, R.C., Murrell, J.C., 2011. Microbiology of aquatic  
695 surface microlayers. *FEMS Microbiol. Rev.* 35(2), 233–246. doi:  
696 10.1111/j.1574 - 6976.2010.00246.x
- 697 Cunliffe, M., Wurl, O., 2014. Guide to best practices to study the ocean's surface.  
698 Occasional Publications of the Marine Biological Association of the United  
699 Kingdom, Plymouth, UK. 118 pp.
- 700 Doney, S.C., Najjar, R.G., Stewart, S., 1995. Photochemistry, mixing and diurnal cycles  
701 in the upper ocean. *J. Mar. Res.* 53(3), 341–369. doi: 10.1357/0022240953213133
- 702 Edson, J.B., Fairall, C.W., Bariteau, L., Zappa, C.J., Cifuentes-Lorenzen, A., Mcgillis,  
703 W.R., Pezoa, S., Hare, J.E., Helmig, D., 2011. Direct covariance measurement of  
704 CO<sub>2</sub> gas transfer velocity during the 2008 Southern Ocean Gas Exchange  
705 Experiment: Wind speed dependency. *J. Geophys. Res.* 116(C4), 1943–1943. doi:  
706 10.1029/2011jc007022
- 707 Engel, A., Galgani, L., 2016. The organic sea-surface microlayer in the upwelling  
708 region off the coast of Peru and potential implications for air–sea exchange  
709 processes. *Biogeosciences* 13, 989–1007. doi: 10.5194/bg-13-989-2016
- 710 Erickson, D.J., 1989. Ocean to atmosphere carbon monoxide flux: Global inventory  
711 and climate implications. *Global Biogeochem. Cyc.* 3(4), 305–314. doi:  
712 10.1029/GB003i004p00305
- 713 Fichot, C.G., Miller, W.L., 2010. An approach to quantify depth-resolved marine  
714 photochemical fluxes using remote sensing: application to carbon monoxide (CO)  
715 photoproduction. *Remote Sens. Environ.* 114, 1363–1377. doi:  
716 10.1016/j.rse.2010.01.019
- 717 Garrett, W.D., 1965. Collection of slick-forming materials from the sea surface. *Limnol.*



- 718 Oceanogr. 10(1965), 602–605. doi: 10.2307/2833459
- 719 Gros, V., Peeken, I., Bluhm, K., Zöllner, E., Sarda-Esteve, R., Bonsang, B., 2009.
- 720 Carbon monoxide emissions by phytoplankton: evidence from laboratory
- 721 experiments. Environ. Chem. 6, 369–379. doi: 10.1071/EN09020
- 722 Guallar, C., Flos, J., 2019. Linking phytoplankton primary production and
- 723 chromophoric dissolved organic matter in the sea. Prog. Oceanogr. 176, 102116.
- 724 doi: 10.1016/j.pocean.2019.05.008
- 725 Johnson, J.E., Bates, T.S., 1996. Sources and sinks of carbon monoxide in the mixed
- 726 layer of the tropical south Pacific Ocean. Global Biogeochem. Cy. 10(2), 347–359.
- 727 doi: 10.1029/96GB00366
- 728 Kettle, A.J., 2005. Diurnal cycling of carbon monoxide (CO) in the upper ocean near
- 729 Bermuda. Ocean Model. 8(4), 337–367. doi: 10.1016/j.ocemod.2004.01.003
- 730 Kieber, D.J., Miller, G.W., Neale, P.J., Mopper, K., 2014. Wavelength and temperature-
- 731 dependent apparent quantum yields for photochemical formation of hydrogen
- 732 peroxide in seawater. Env. Sci.: Processes Impacts. doi: 10.1039/C4EM00036F.
- 733 Li, Y., He, Z., Yang, G.P., Wang, H., Zhuang, G.C., 2019. Volatile halocarbons in the
- 734 marine atmosphere and surface seawater: diurnal and spatial variations and
- 735 influences of environmental factors. Atmos. Environ. 214, 116820.
- 736 10.1016/j.atmosenv.2019.116820
- 737 Li, Y., Fichot, C.G., Geng, L., Scarratt, M.G., Xie, H., 2020. The Contribution of
- 738 Methane Photoproduction to the Oceanic Methane Paradox. Geophys. Res. Lett.
- 739 47(14), 1–10. doi: 10.1029/2020GL088362
- 740 Liss, P.S., Merlivat, L., 1986. Air-sea gas exchange rates: Introduction and synthesis.



- 741 In P. Buat-Ménard (Ed.), The role of air-sea exchange in geochemical cycling, (pp.  
742 113–127). Dordrecht, Netherlands: Springer. Retrieved from  
743 [papers3://publication/uuid/BAFDE7E6-A29C-466C-B1CD-2A7DAFF930D5](https://papers3://publication/uuid/BAFDE7E6-A29C-466C-B1CD-2A7DAFF930D5)  
744 Liss, P.S., Duce, R.A., (Eds) 1997. The sea surface and global change. Cambridge, UK:  
745 Cambridge University Press.  
746 Liss, P.S., Duce, R.A., 2005. The Sea Surface and Global Change, Cambridge  
747 University Press, UK, ISBN-13: 978-0511525025.  
748 Lønborg, C., Álvarez-Salgado, X.A., Duggan, S., Carreira, C., 2018. Organic matter  
749 bioavailability in tropical coastal waters: The Great Barrier Reef. *Limnol.*  
750 *Oceanogr.* 63, 1015–1035. doi: 10.1002/lno.10717  
751 Ma, Q.Y., Yang, G.P., 2023. Roles of phytoplankton, microzooplankton, and bacteria in  
752 DMSP and DMS transformation processes in the East China Continental Sea. *Prog.*  
753 *Oceanogr.* 103003. doi: 10.1016/j.pocean.2023.103003  
754 Mopper, K., Kieber, D.J., 2002. Photochemistry and cycling of carbon, sulfur, nitrogen  
755 and phosphorus. In: Hansell, D.A., Carlson, C.A. (Eds.), *Biogeochemistry of*  
756 *Marine Dissolved Organic Matter*. AP. doi: 10.1016/b978-012323841-2/50011-7  
757 Nelson, E.D., McConnell, L.L., Baker, J.E., 1998. Diffusive Exchange of Gaseous  
758 Polycyclic Aromatic Hydrocarbons and Polychlorinated Biphenyls Across the  
759 Air–Water Interface of the Chesapeake Bay. *Environ. Sci. Technol.* 32(7), 912–  
760 919. doi: 10.1021/es9706155



- 761    Nguyen, N.H., Turner, A.J., Yin, Y., Prather, M.J., Frankenberg, C., 2020. Effects of  
762       chemical feedbacks on decadal methane emissions estimates. *Geophys. Res. Lett.*  
763       47(3), e2019GL085706. doi: 10.1029/2019GL085706
- 764    Obernosterer, I., Catala, P., Reinthaler, T., Herndl, G.J., Lebaron, P., 2006. Enhanced  
765       heterotrophic activity in the surface microlayer of the Mediterranean Sea. *Aquat.*  
766       *Microb. Ecol.* 39, 293–302. doi: 10.3354/ame039293
- 767    Obernosterer, I., Catala, P., Lami, R., Caparros, J., Ras, J., Bricaud, A., Dupuy, C., van  
768       Wambeke, F., Lebaron, P., 2008. Biochemical characteristics and bacterial  
769       community structure of the sea surface microlayer in the South Pacific Ocean.  
770       *Biogeosciences*, 5, 693–705. doi: 10.5194/bg-5-693-2008
- 771    Orellana, M.V., Matrai, P.A., Leck, C., Rauschenberg, C.D., Lee, A.M., Coz, E., 2011.  
772       Marine microgels as a source of cloud condensation nuclei in the high Arctic. *Proc.*  
773       *Natl. Acad. Sci.* 108, 13612–13617. doi: 10.1073/pnas.1102457108.
- 774    Pereira, R., Schneider-Zapp, K., Upstill-Goddard, R.C., 2016. Surfactant control of gas  
775       transfer velocity along an offshore coastal transect: results from a laboratory gas  
776       exchange tank. *Biogeosciences*, 13, 3981–3989. doi: 10.5194/bg-13-3981-2016.
- 777    Pereira, R., Ashton, I., Sabbaghzadeh, B., Shutler, J.D., Upstill-Goddard, R.C., 2018.  
778       Reduced air–sea CO<sub>2</sub> exchange in the Atlantic Ocean due to biological surfactants.  
779       *Nat. Geosci.* 11, 492–496. doi: 10.1038/s41561-018-0136-2
- 780    Ren, C., Yang, G., Lu, X., 2014. Autumn photoproduction of carbon monoxide in  
781       Jiaozhou Bay China. *J. Ocean U. China*, 13(3), 428–436. doi: 10.1007/s11802-  
782       014-2225-1



- 783 Rickard, P.C., Uher, G., Upstill-Goddard, R.C., Frka, S., Mustaffa, N.I.H., Banko-Kubis,  
784 H.M., Hanne Marie, B.K., Ana Cvitesic, K., Blazenka, G., Christian, S., Oliver,  
785 W., 2019. Reconsideration of seawater surfactant activity analysis based on an  
786 inter-laboratory comparison study. *Mar. Chem.* 208, 103–111. doi:  
787 10.1016/j.marchem.2018.11.012
- 788 Rickard, P.C., Uher, G., Upstill-Goddard, R.C., 2022. Photo-reactivity of surfactants in  
789 the sea-surface microlayer and subsurface water of the Tyne estuary, UK. *Geophys.*  
790 *Res. Lett.* 49(4), e2021GL095469. doi: 10.1029/2021GL095469
- 791 Sabbaghzadeh, B., Upstill-Goddard, R.C., Beale, R., Pereira, R., Nightingale, P.D.,  
792 2017. The Atlantic Ocean surface microlayer from 50°N to 50°S is ubiquitously  
793 enriched in surfactants at wind speeds up to 13 m s<sup>-1</sup>. *Geophys. Res. Lett.* 44(6),  
794 2852–2858. doi: 10.1002/2017GL072988
- 795 Song, G., Richardson, J.D., Werner, J.P., Xie, H., Kieber, D.J., 2015. Carbon monoxide  
796 photoproduction from particles and solutes in the Delaware estuary under  
797 contrasting hydrological conditions. *Environ. Sci. Technol.* 49(24), 14048–14056.  
798 doi: 10.1021/acs.est.5b02630
- 799 Stedmon, C.A., Markager, S., Bro, R., 2003. Tracing dissolved organic matter in aquatic  
800 environments using a new approach to fluorescence spectroscopy. *Mar. Chem.*  
801 82(3–4), 239–254. doi: 10.1016/S0304-4203(03)00072-0
- 802 Stubbins, A., Uher, G., Kitidis, V., Law, C.S., Upstill-Goddard, R.C., Woodward,  
803 E.M.S., 2006. The open-ocean source of atmospheric carbon monoxide. *Deep-Sea*  
804 *Res. Part II*, 53, 1685–1694. doi: 10.1016/j.dsr2.2006.05.010
- 805 Stubbins, A., Law, C., Uher, G., Upstill-Goddard, R., 2011. Carbon monoxide apparent  
806 quantum yields and photoproduction in the Tyne estuary. *Biogeosciences* 8, 703–  
807 713. doi:10.5194/bg-8-703-2011



- 808 Sugai, Y., Tsuchiya, K., Shimode, S., Toda, T., 2021. Photochemical Production and  
809 Biological Consumption of CO in the SML of Temperate Coastal Waters and Their  
810 Implications for Air-Sea CO Exchange. *J. Geophys. Res.: Oceans* 125(4), 1–14.  
811 doi: 10.1029/2019JC015505
- 812 Sun, H., Zhang, Y.H., Tan, S., Zheng, Y.F., Zhou, S., Ma, Q.Y., Yang, G.P., Todd, J.,  
813 Zhang, X.H., 2020. DMSP-Producing Bacteria Are More Abundant in the Surface  
814 Microlayer than Subsurface Seawater of the East China Sea. *Microb. Ecol.* 80,  
815 350–365. doi: 10.1007/s00248-020-01507-8
- 816 Troxler, R.F., 1972. Synthesis of bile pigments in plants. Formation of carbon monoxide  
817 and phycocyanobilin in wild-type and mutant strains of the alga, *Cyanidium*  
818 *caldarium*. *Biochemistry* 11(23), 4235–4242. doi: 10.1021/bi00773a007
- 819 Tsai, W.T., Liu, K.K., 2003. An assessment of the effect of sea surface surfactant on  
820 global atmosphere–ocean CO<sub>2</sub> flux. *J. Geophys. Res.: Oceans* 108, 3127. doi:  
821 10.1029/2000jc000740
- 822 Wang, H., Sun, F., Liu, W., 2020. Characteristics of Streamflow in the Main stream of  
823 Changjiang River and the Impact of the Three Gorges Dam. *Catena* 104498. doi:  
824 10.1016/j.catena.2020.104498
- 825 Weishaar, J.L., Aiken, G.R., Bergamaschi, B.A., Fram, M.S., Fujii, R., Mopper, K.,  
826 2003. Evaluation of specific ultraviolet absorbance as an indicator of the chemical  
827 composition and reactivity of dissolved organic carbon. *Environ. Sci. Technol.* 37,  
828 4702–4708. doi: 10.1021/es030360x
- 829 Wiesenburg, D.A., Guinasso, N.L., 1979. Equilibrium solubilities of methane, carbon  
830 monoxide, and hydrogen in water and sea water. *J. Chem. Eng. Data*, 24(4), 356–  
831 360. doi: 10.1021/jc60083a006



- 832 Wurl, O., Miller, L., Röttgers, R., Vagle, S., 2009. The distribution and fate of surface-  
833 active substances in the sea-surface microlayer and water column. *Mar. Chem.* 115,  
834 1–9. doi: 10.1016/j.marchem.2009.04.007
- 835 Wurl, O., Stolle, C., Thuoc, C.V., Thu, P.T., Mari, X., 2016. Biofilm-like properties of  
836 the sea surface and predicted effects on air-sea CO<sub>2</sub> exchange. *Prog. Oceanogr.*  
837 144, 15–24. doi: 10.1016/j.pocean.2016.03.002
- 838 Xie, H., Andrews, S.S., Martin, W.R., Miller, J., Zafiriou, O.C., 2002. Validated  
839 methods for sampling and headspace analysis of carbon monoxide in seawater.  
840 *Mar. Chem.* 77(2), 93–108. doi: 10.1016/S0304-4203(01)00065-2
- 841 Xie, H., Zafiriou, O.C., Umile, T.P., Kieber, D.J., 2005. Biological consumption of  
842 carbon monoxide in Delaware Bay, NW Atlantic and Beaufort Sea. *Mar. Ecol.*  
843 *Prog. Seri.* 290, 1–14. doi: 10.3354/meps290001
- 844 Xie, H.X., Bélanger, S., 2009. Photobiogeochemical cycling of carbon monoxide in the  
845 southeastern Beaufort Sea in spring and autumn. *Limnol. Oceanogr.* 54(1), 234–  
846 249. doi: 10.4319/lo.2009.54.1.0234
- 847 Xu, G.B., Xu, F., Ji, X., Zhang, J., Yan., S.B., Mao, S.H., Yang, G.P., 2023. Carbon  
848 monoxide cycling in the Eastern Indian Ocean. *J. Geophys. Res. Oceans* 128(5).  
849 doi: 10.1029/2022JC019411
- 850 Yamashita, Y., Hashihama, F., Saito, H., Fukuda, H., Ogawa, H., 2017. Factors  
851 controlling the geographical distribution of fluorescent dissolved organic matter  
852 in the surface waters of the Pacific Ocean. *Limnol. Oceanogr.* 62(6), 2360–2374.  
853 doi: 10.1002/lno.10570
- 854 Yamashita, Y., Jaffé, R., 2008. Characterizing the interactions between trace metals and  
855 dissolved organic matter using excitation-emission matrix and parallel factor



- 856 analysis. *Environ. Sci. Technol.* 42(19), 7374–7379. doi: 10.1021/es801357h
- 857 Yang, G.P., Ren, C.Y., Lu, X.L., Liu, C.Y., Ding, H.B., 2011. Distribution, flux, and
- 858 photoproduction of carbon monoxide in the East China Sea and Yellow Sea in
- 859 spring. *J. Geophys. Res.: Oceans* 116(C2), C02001. doi: 10.1029/2010jc006300
- 860 Yang, G.P., Wang, W.L., Lu, X.L., Ren, C.Y., 2010. Distribution, flux and biological
- 861 consumption of carbon monoxide in the Southern Yellow Sea and the East China
- 862 Sea. *Mar. Chem.* 122(1–4), 74–82. doi: 10.1016/j.marchem.2010.08.001
- 863 Yang, L., Zhang, J., Yang, G.P., 2021. Mixing behavior, biological and photolytic
- 864 degradation of dissolved organic matter in the East China Sea and the Yellow Sea.
- 865 *Sci. Total Environ.* 762(6), 143164. doi: 10.1016/j.scitotenv.2020.143164
- 866 Yang, L., Zhang, J., Engel A., Yang, G.P., 2022. Spatio-temporal distribution,
- 867 photoreactivity and environmental control of dissolved organic matter in the sea-
- 868 surface microlayer of the eastern marginal seas of China. *Biogeosciences*, 19,
- 869 5251–5268. doi: 10.5194/bg-19-5251-2022
- 870 Yang, L., Gong, C.Y., Mo, X.J., Zhang, J., Yang, B., Yang, G.P., 2024. Carbon monoxide
- 871 in the marine atmosphere and seawater: Spatiotemporal distribution and
- 872 photobiogeochemical cycling. *J. Geophys. Res.: Oceans*, 129(8), e2024JC021286.
- 873 doi: 10.1029/2024JC021286
- 874 Zafiriou, O.C., Andrews, S.S., Wang W., 2003. Concordant estimates of oceanic carbon
- 875 monoxide source and sink processes in the Pacific yield a balanced global “blue-
- 876 water” CO budget. *Global Biogeochem. Cy.* 17(1), 1015–1027. doi:
- 877 10.1029/2001gb001638
- 878 Zafiriou, O.C., Xie, H., Nelson, N.B., Wang, N.W., 2008. Diel carbon monoxide cycling
- 879 in the upper Sargasso Sea near Bermuda at the onset of spring and in midsummer.
- 880 *Limnol. Oceanogr.* 53(2), 835–850. doi: 10.2307/40006463



- 881 Zhang, J., Wang, J., Zhuang, G.C., Yang G.P., 2019. Carbon monoxide cycle in the  
882 Bohai Sea and the Yellow Sea: Spatial variability, sea-air exchange and biological  
883 consumption in autumn. *J. Geophys. Res.: Oceans* 124, 4248–4257. doi:  
884 10.1029/2018JC014864
- 885 Zhang, Y., Xie, H., 2012. The sources and sinks of carbon monoxide in the St. Lawrence  
886 system. *Deep-Sea Res. Part II: Topical Studies in Oceanography* 81, 114–123. doi:  
887 10.1016/j.dsr2.2011.09.003
- 888 Zhang, Y., Xie, H., Chen, G., 2006. Factors affecting the efficiency of carbon monoxide  
889 photoproduction in the St. Lawrence estuarine system (Canada). *Environ. Sci.*  
890 *Technol.* 40(24), 7771–7777. doi: 10.1021/es0615268
- 891 Zhang, Y., Xie, H., Fichot, C.G., Chen, G., 2008. Dark production of carbon monoxide  
892 (CO) from dissolved organic matter in the St. Lawrence estuarine system:  
893 Implication for the global coastal and blue water CO budgets. *J. Geophys. Res.:*  
894 *Oceans* 113(12), 1–9. doi: 10.1029/2008JC004811
- 895 Zhu, W.Z., Zhang, H.H., Zhang, J., Yang, G.P., 2018. Seasonal variation in  
896 chromophoric dissolved organic matter and relationships among fluorescent  
897 components, absorption coefficients, and dissolved organic carbon in the Bohai  
898 Sea, the Yellow Sea and the East China Sea. *J. Mar. Syst.* 180, 9–23. doi:  
899 10.1016/j.jmarsys.2017.12.003

900



901

902 **Figure Captions**

903 **Fig. 1.** Map of sampling stations in the East China Sea and the Yellow Sea during winter. Red box  
904 represented photochemical incubation experiment stations and purple rhomboid represented  
905 biological consumption experiment stations

906 ■ : Stations for CO microbial consumption incubation experiments; ▲ : Stations for CO  
907 photochemical production incubation experiments; ★ : Station for both CO microbial consumption  
908 and photochemical production incubation experiments; ● : Stations only for seawater sampling.

909 **Fig. 2.** Distributions of CO and the marine-like fluorescence C3 in the SSW and the SML; CO in  
910 the atmosphere, and the flux of CO in the SSW and the SML; and the enrichment factors of CO and  
911 the marine-like fluorescence C3 in the SML, and temperature and salinity in the in the East China  
912 Sea and the Yellow Sea during winter. The concentration profiles of CO in the SSW (d) resemble  
913 those of CO in the SML, which is evidence for biogeochemically very stable, salt-like (conservative)  
914 properties.

915 **Fig. 3.** Variations in the  $[CO]_{sml}$ ,  $[CO]_{ssw}$ ,  $a_{CDOM}(254)$ , and DOC, EFs of  $[CO]$ ,  $a_{CDOM}(254)$ , and  
916 DOC with the sampling time at each station.

917 **Fig. 4.** Variations in photochemical CO production rate of CO ( $K_{photo}$ ) in the SML (red) and the  
918 SSW (black) (a). Variations in microbial consumption rate constants of CO ( $K_{bio}$ ) in the SML (red)  
919 and the SSW (black).

920 **Fig. 5.** Correlations between the instantaneous sea-to-air fluxes of CO (Flux) in the SSW and the  
921 SML with  $a_{CDOM}(254)$ , marine humic-like C3, wind speeds, temperature, and salinity in the East  
922 China Sea and the Yellow Sea during winter.



923 **Fig. 6.** Budget model of CO transformation in the SML and the SSW in the eastern marginal seas  
924 of China during winter. (The arrows represent simplified processes of CO, CDOM and bacteria in  
925 the SML and the SSW. Solid arrows represent CO sources (red) or sinks (blue) processes, and CO,  
926 CDOM, bacteria enrichment (black) processes. The production (red) and removal (blue) rates and  
927 their individual contributions percentages represent simplified transformation processes of CO in  
928 the SML and the SSW. The black percentage represent the enrichment processes of CO, CDOM and  
929 bacteria in the SML. Bacterial enrichment was calculated by Sun et al., 2020).

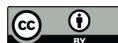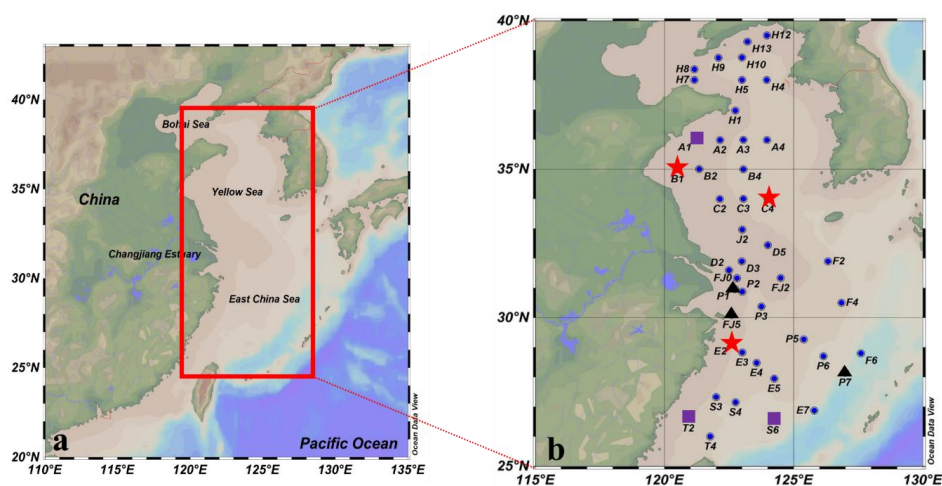

Fig. 1. Map of sampling stations in the East China Sea and the Yellow Sea during winter. Red box represented photochemical incubation experiment stations and purple rhomboid represented biological consumption experiment stations.

■ : Stations for CO microbial consumption incubation experiments; ▲ : Stations for CO photochemical production incubation experiments; ★ : Station for both CO microbial consumption and photochemical production incubation experiments; ● : Stations only for seawater sampling.

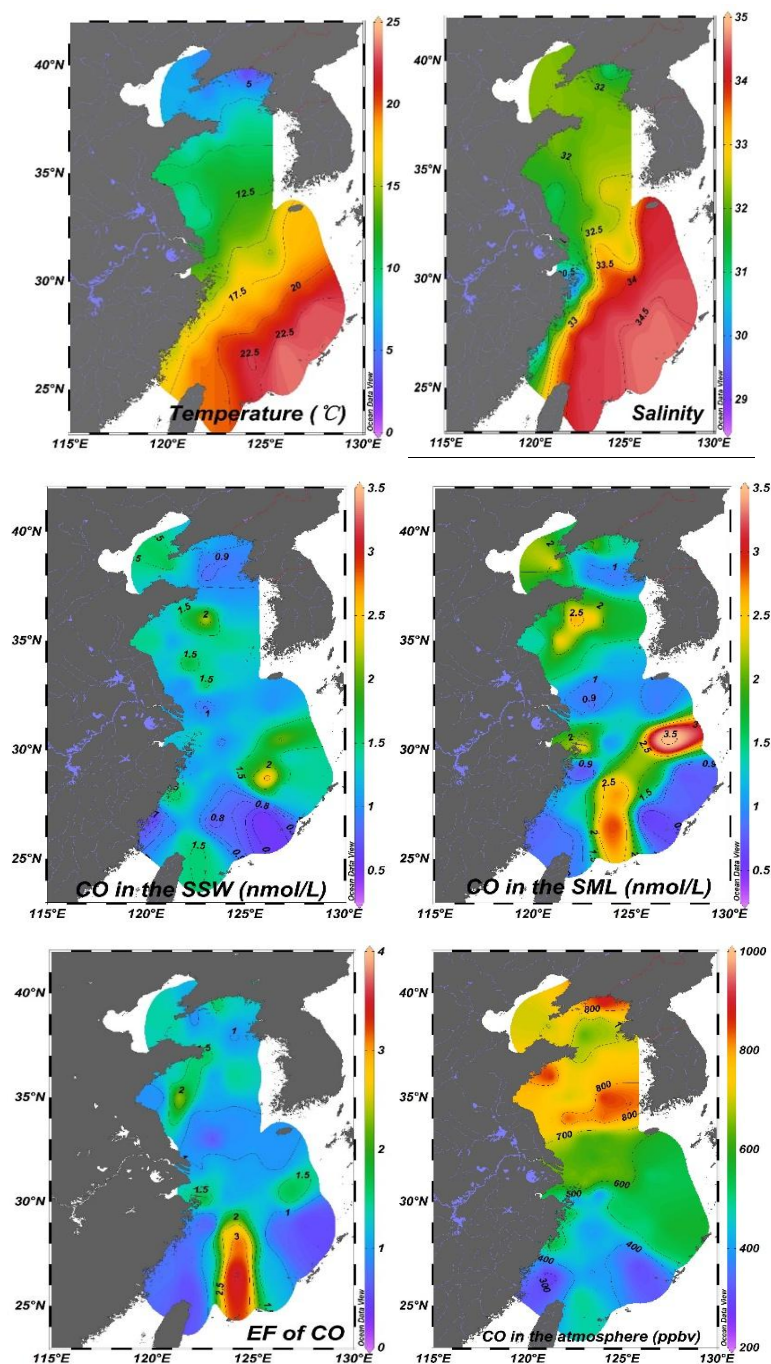

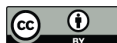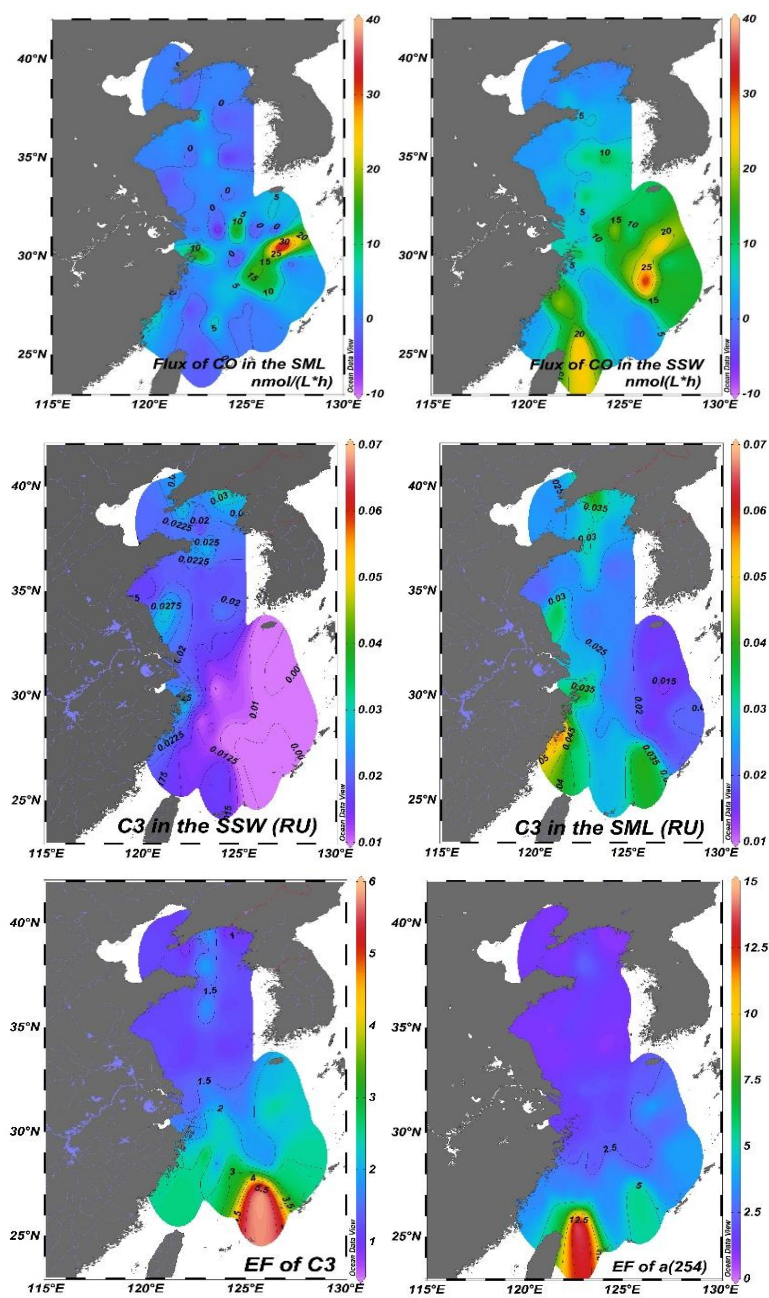

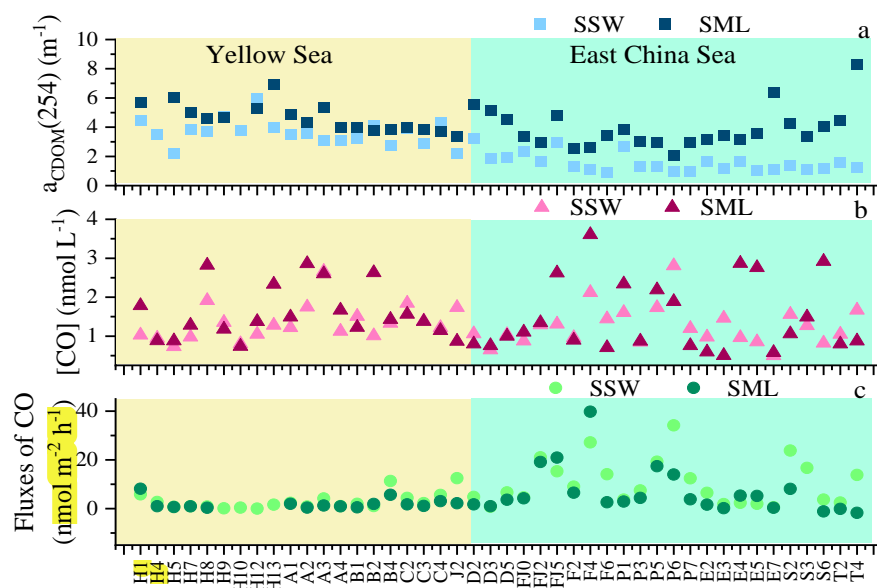

**Fig. 2.** Distributions of CO and the marine-like fluorescence C3 in the SSW and the SML; CO in the atmosphere, and the flux of CO in the SSW and the SML; and the enrichment factors of CO and the marine-like fluorescence C3 in the SML, and temperature and salinity in the in the East China Sea and the Yellow Sea during winter. The concentration profiles of CO in the SSW (d) resemble those of CO in the SML, which is evidence for biogeochemically very stable, salt-like (conservative) properties.

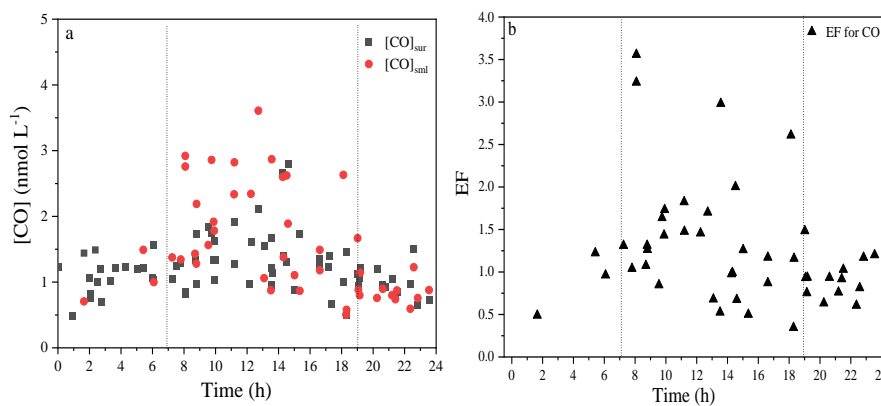

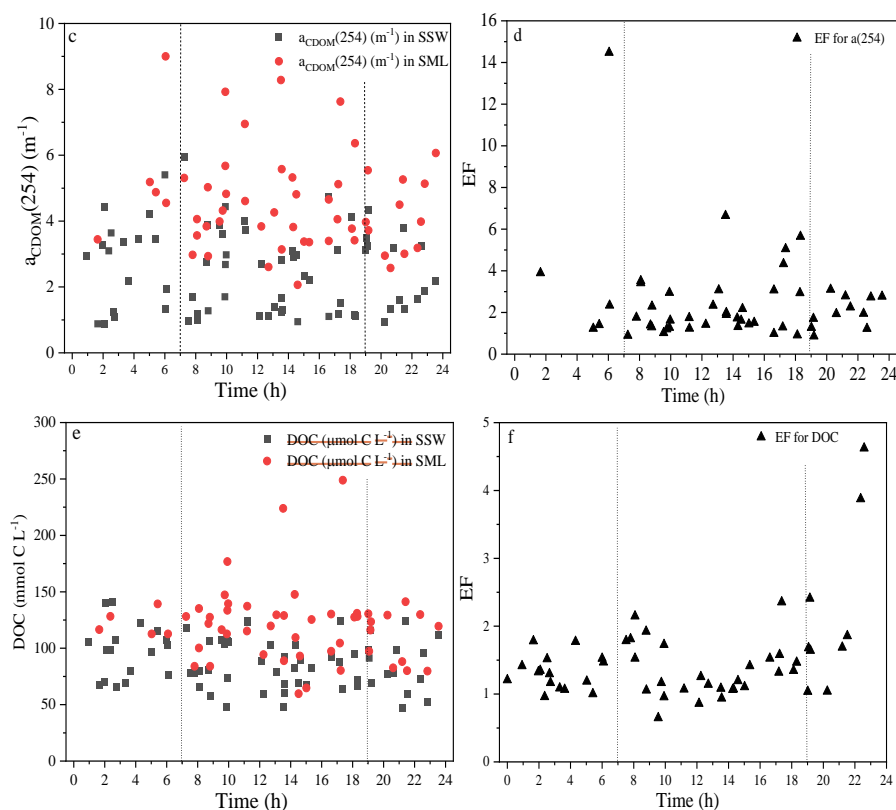

Fig. 3. Variations in the  $[CO]_{sml}$ ,  $[CO]_{ssw}$ ,  $a_{CDOM}(254)$ , and DOC, EFs of  $[CO]$ ,  $a_{CDOM}(254)$ , and DOC with the sampling time at each station.

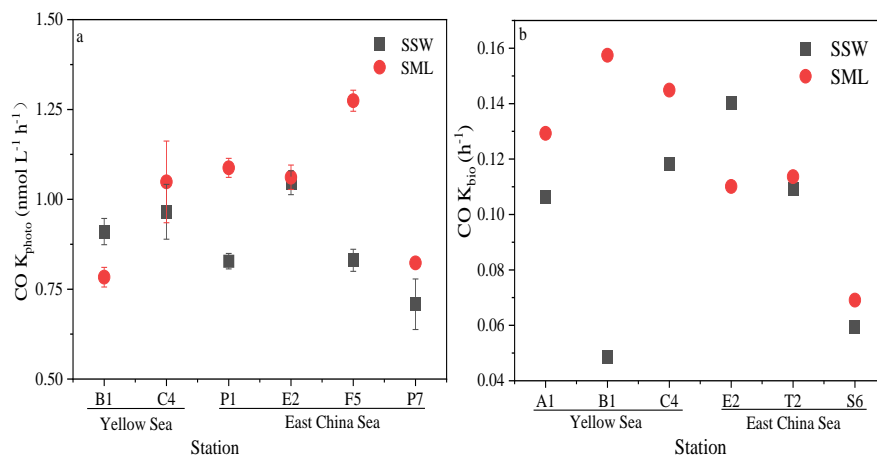

Fig. 4. Variations in photochemical CO production rate of CO ( $K_{photo}$ ) in the SML (red) and the SSW (black) (a). Variations in microbial consumption rate constants of CO ( $K_{bio}$ ) in the SML (red) and the SSW (black) (b).



(red) and the SSW (black).

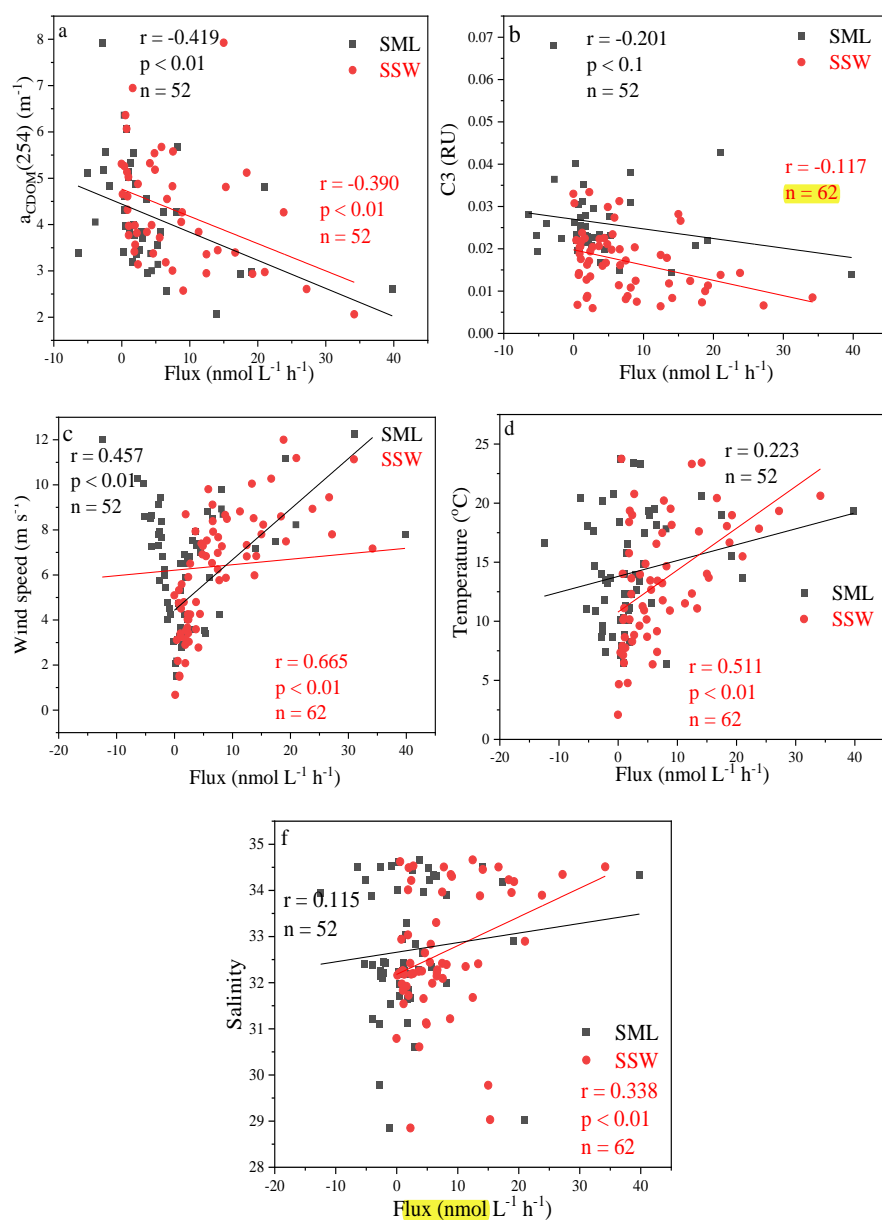

Fig. 5. Correlations between the instantaneous sea-to-air fluxes of CO (Flux) in the SSW and the SML with  $a_{CDOM}(254)$ , marine humic-like C3, wind speeds, temperature, and salinity in the East China Sea and the Yellow Sea during winter.

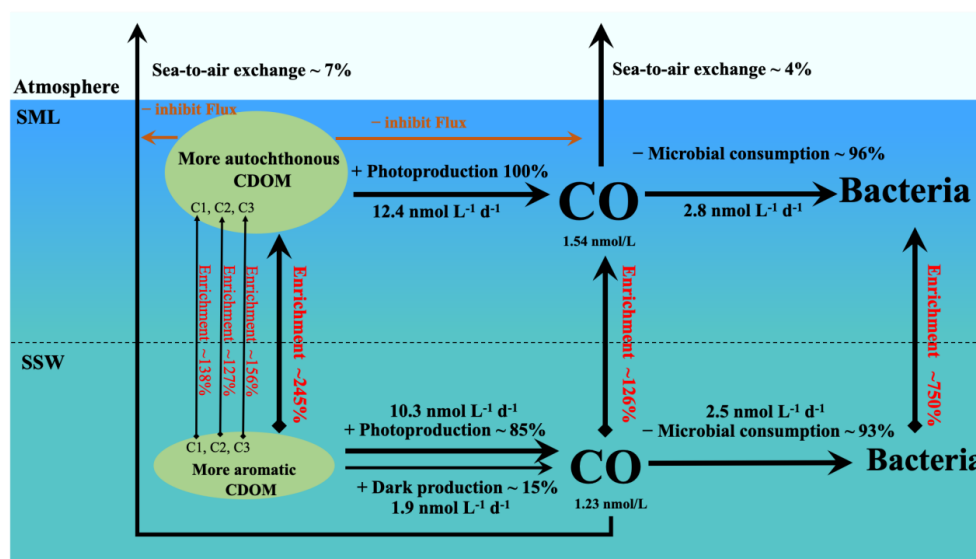

Fig. 6. Budget model of CO transformation in the SML and the SSW in the eastern marginal seas

of China during winter. (Bacterial enrichment was calculated by Sun et al., 2020).

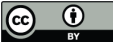

Table 1 Correlation coefficients between [CO]<sub>sw</sub>, CDOM optical parameters, DOC, Chl-*a*, O<sub>2</sub>, salinity, and temperature in SSW a) and SML b).

a)

|                         | [CO] <sub>sw</sub> | Temperature | Salinity        | O <sub>2</sub> | a <sub>CDOM</sub> (254) | a <sub>CDOM</sub> (330) | a <sub>CDOM</sub> (355) | C1             | C2             | C3             | DOC     | Chl- <i>a</i> | SUV <sub>A254</sub> | S <sub>275-295</sub> | S <sub>350-400</sub> |
|-------------------------|--------------------|-------------|-----------------|----------------|-------------------------|-------------------------|-------------------------|----------------|----------------|----------------|---------|---------------|---------------------|----------------------|----------------------|
| Temperature             | -0.001             |             |                 |                |                         |                         |                         |                |                |                |         |               |                     |                      |                      |
| Salinity                | 0.017              | 0.699**     |                 |                |                         |                         |                         |                |                |                |         |               |                     |                      |                      |
| O <sub>2</sub>          | -0.072             | -0.977**    | -0.723**        |                |                         |                         |                         |                |                |                |         |               |                     |                      |                      |
| a <sub>CDOM</sub> (254) | -0.029             | -0.907**    | <b>-0.716**</b> | 0.876**        |                         |                         |                         |                |                |                |         |               |                     |                      |                      |
| a <sub>CDOM</sub> (330) | -0.118             | -0.783**    | <b>-0.690**</b> | 0.758**        | 0.939**                 |                         |                         |                |                |                |         |               |                     |                      |                      |
| a <sub>CDOM</sub> (355) | -0.151             | -0.717**    | <b>-0.622**</b> | 0.690**        | 0.894**                 | 0.990**                 |                         |                |                |                |         |               |                     |                      |                      |
| C1                      | 0.008              | -0.591**    | <b>-0.758**</b> | 0.596**        | <b>0.675**</b>          | 0.680**                 | 0.632**                 |                |                |                |         |               |                     |                      |                      |
| C2                      | 0.053              | -0.324*     | <b>-0.341**</b> | 0.286*         | <b>0.533**</b>          | 0.592**                 | 0.599**                 | 0.759**        |                |                |         |               |                     |                      |                      |
| C3                      | -0.049             | -0.788**    | <b>-0.851**</b> | 0.779**        | <b>0.894**</b>          | 0.887**                 | 0.838**                 | 0.891**        | 0.665**        |                |         |               |                     |                      |                      |
| DOC                     | 0.008              | -0.598**    | -0.239          | 0.583**        | <b>0.532**</b>          | 0.394**                 | 0.354**                 | 0.241          | 0.146          | 0.323*         |         |               |                     |                      |                      |
| Chl- <i>a</i>           | 0.109              | -0.357**    | -0.092          | 0.415**        | <b>0.333**</b>          | 0.235                   | 0.208                   | 0.104          | 0.159          | 0.215          | 0.348** |               |                     |                      |                      |
| SUV <sub>A254</sub>     | -0.081             | -0.676**    | -0.705**        | 0.654**        | <b>0.824**</b>          | <b>0.860**</b>          | <b>0.831**</b>          | <b>0.653**</b> | <b>0.560**</b> | <b>0.853**</b> | -0.006  | 0.134         |                     |                      |                      |
| S <sub>275-295</sub>    | 0.045              | 0.100       | 0.099           | -0.092         | -0.204                  | -0.385**                | -0.448**                | -0.197         | -0.241         | -0.269*        | -0.009  | 0.084         | -0.241              |                      |                      |
| S <sub>350-400</sub>    | -0.001             | 0.009       | -0.060          | 0.044          | -0.095                  | -0.214                  | -0.279*                 | 0.009          | -0.103         | -0.043         | -0.088  | 0.026         | -0.050              | 0.867**              |                      |
| S <sub>R</sub>          | 0.059              | 0.346**     | 0.421**         | -0.429**       | -0.254*                 | -0.220                  | -0.134                  | -0.343**       | -0.104         | -0.393**       | -0.087  | -0.148        | -0.316*             | -0.506**             | -0.645**             |

\*Correlation is significant at the 0.05 level (two-tailed).

\*\*Correlation is significant at the 0.01 level (two-tailed), N = 44.



b)

|                          | [CO] <sub>atm</sub> | Temperature | Salinity | SML- $\alpha_{CDOM}(254)$ | SML- $\alpha_{CDOM}(330)$ | SML- $\alpha_{CDOM}(355)$ | SML C1  | SML C2         | SML C3  | SML DOC | SML SUVA <sub>254</sub> | SML S <sub>275-295</sub> | SML S <sub>350-400</sub> |
|--------------------------|---------------------|-------------|----------|---------------------------|---------------------------|---------------------------|---------|----------------|---------|---------|-------------------------|--------------------------|--------------------------|
| Temperature              | -0.032              |             |          |                           |                           |                           |         |                |         |         |                         |                          |                          |
| Salinity                 | -0.098              | 0.699**     |          |                           |                           |                           |         |                |         |         |                         |                          |                          |
| SML $\alpha_{CDOM}(254)$ | -0.137              | -0.037      | -0.045   |                           |                           |                           |         |                |         |         |                         |                          |                          |
| SML $\alpha_{CDOM}(330)$ | -0.119              | -0.113      | -0.135   | <b>0.948**</b>            |                           |                           |         |                |         |         |                         |                          |                          |
| SML $\alpha_{CDOM}(355)$ | -0.143              | -0.114      | -0.146   | <b>0.901**</b>            | <b>0.989**</b>            |                           |         |                |         |         |                         |                          |                          |
| SML C1                   | -0.095              | 0.158       | -0.156   | <b>0.711**</b>            | 0.504**                   | 0.434**                   |         |                |         |         |                         |                          |                          |
| SML C2                   | -0.217              | 0.089       | -0.106   | <b>0.670**</b>            | 0.675**                   | 0.673**                   | 0.702** |                |         |         |                         |                          |                          |
| SML C3                   | -0.060              | 0.092       | -0.154   | <b>0.823**</b>            | 0.622**                   | 0.541**                   | 0.938** | 0.703**        |         |         |                         |                          |                          |
| SML DOC                  | -0.018              | 0.136       | 0.174    | <b>0.898**</b>            | 0.783**                   | 0.705**                   | 0.572** | 0.280          | 0.665** |         |                         |                          |                          |
| SML SUVA <sub>254</sub>  | -0.063              | -0.250      | -0.439** | 0.136                     | 0.303*                    | 0.376**                   | 0.240   | <b>0.501**</b> | 0.262   | -0.272  |                         |                          |                          |
| SML S <sub>275-295</sub> | 0.254               | 0.241       | 0.223    | 0.040                     | -0.217                    | -0.318*                   | 0.323*  | -0.056         | 0.336*  | 0.216   | -0.409**                |                          |                          |
| SML S <sub>350-400</sub> | 0.270               | 0.112       | 0.082    | 0.136                     | -0.090                    | -0.187                    | 0.385** | 0.047          | 0.427** | 0.244   | -0.281                  | <b>0.968**</b>           |                          |
| SML S <sub>g</sub>       | -0.288              | 0.231       | 0.213    | -0.248                    | -0.057                    | 0.044                     | -0.276  | 0.029          | -0.339* | -0.296* | 0.167                   | -0.726**                 | -0.776**                 |

\*Correlation is significant at the 0.05 level (two-tailed).

\*\*Correlation is significant at the 0.01 level (two-tailed). N = 44.



Table 2 Correlation coefficients between EFs of CO, DOM absorption, DOC, three fluorescence components, temperature, salinity, and wind speed.

|                       | EF of CO       | EF of DOC      | EF of $a_{CDOM}(254)$ | EF of $a_{CDOM}(330)$ | EF of $a_{CDOM}(355)$ | EF of C1       | EF of C2      | EF of C3       | Temperature | Salinity | Wind speed |
|-----------------------|----------------|----------------|-----------------------|-----------------------|-----------------------|----------------|---------------|----------------|-------------|----------|------------|
| EF of DOC             | -0.098         |                |                       |                       |                       |                |               |                |             |          |            |
| EF of $a_{CDOM}(254)$ | -0.067         | 0.867**        |                       |                       |                       |                |               |                |             |          |            |
| EF of $a_{CDOM}(330)$ | -0.111         | 0.726**        | 0.912**               |                       |                       |                |               |                |             |          |            |
| EF of $a_{CDOM}(355)$ | -0.124         | 0.556**        | 0.752**               | 0.945**               |                       |                |               |                |             |          |            |
| EF of C1              | 0.081          | 0.731**        | 0.898**               | 0.753**               | 0.619**               |                |               |                |             |          |            |
| EF of C2              | -0.084         | 0.149          | 0.586**               | 0.600**               | 0.580**               | 0.486**        |               |                |             |          |            |
| EF of C3              | -0.022         | 0.796**        | 0.935**               | 0.830**               | 0.714**               | 0.964**        | 0.502**       |                |             |          |            |
| Temperature           | 0.037          | <b>0.363**</b> | <b>0.528**</b>        | <b>0.533**</b>        | <b>0.456**</b>        | <b>0.617**</b> | <b>0.296*</b> | <b>0.604**</b> |             |          |            |
| Salinity              | 0.006          | <b>0.289*</b>  | <b>0.478**</b>        | <b>0.493**</b>        | <b>0.427**</b>        | <b>0.500**</b> | <b>0.268</b>  | <b>0.491**</b> | 0.699**     |          |            |
| Wind speed            | -0.177         | 0.008          | 0.186                 | 0.159                 | 0.161                 | -0.130         | -0.006        | -0.105         | 0.129       | 0.052    |            |
| Solar irradiance      | <b>0.409**</b> | -0.024         | -0.051                | -0.082                | -0.050                | 0.022          | -0.139        | 0.002          | 0.160       | 0.157    | 0.104      |

\*Correlation is significant at the 0.05 level (two-tailed).

\*\*Correlation is significant at the 0.01 level (two-tailed). N = 44.
